# Supplementary material for: The additionality problem of Ocean Alkalinity Enhancement
Source: Copernicus journal article supplement (doi:10.5194/bg-2023-122), 2023-08-07
Supplement: Supplementary file 1 [file bg-2023-122-supplement.pdf]

# The additionality problem of Ocean Alkalinity Enhancement

Lennart T. Bach

Institute for Marine and Antarctic Studies, University of Tasmania, Hobart, 7004 TAS, Australia.

*Correspondence to:* Lennart T. Bach (Lennart.bach@utas.edu.au)

## Supplementary material

**Table S1.** Additional information on location and time of beach transects. The coordinates provided here show the exact location of the upper end of the swash zone. Transects extended 150-220 m offshore as shown in Fig. 2 in the main text.

| Location      | Latitude   | Longitude  | Sampling time | Low tide           | High tide          |
|---------------|------------|------------|---------------|--------------------|--------------------|
| Clifton South | -42.992299 | 147.524931 | 11:30-1:30    | 0.48 m at 11:02 am | 1.08 m at 17:58 pm |
| Goats         | -43.022267 | 147.500408 | 10:24-11:40   | 0.9 m at 13:26 pm  | 1.02 m at 9:40 am  |
| Clifton North | -42.987078 | 147.54194  | 10:16:-11:23  | 0.51 m at 9:37 am  | 1.15 m at 16:36 pm |
| Wedge         | -43.033122 | 147.475549 | 10:39-11:50   | 0.55 m at 6:56 am  | 1.19 m at 13:57 pm |

**Table S2.** Additional information on beach sand and alkalinity source minerals used for the three laboratory experiments. Sampling coordinates for olivine and steel slag are approximate as it was not recorded where exactly in the quarry/deposition site rocks were collected. The range provided for carbonate weights is based on the two most extreme assumptions that all carbonate in beach sand is MgCO<sub>3</sub> (lower value) or CaCO<sub>3</sub> (upper value).

| Mineral    | Latitude   | Longitude | PIC/POC (mol:mol) | Water content (%) | Carbonate weight (%) |
|------------|------------|-----------|-------------------|-------------------|----------------------|
| Beach 1    | -42.992872 | 147.52372 | 1.02              | 5.9               | 2.7 - 3.3            |
| Beach 2    | -42.991129 | 147.52686 | 2.97              | 13.5              | 11.9 - 14.2          |
| Beach 3    | -42.989084 | 147.53179 | 5.21              | 10.9              | 12.8 - 15.2          |
| Beach 4    | -42.988162 | 147.53538 | 16.25             | 4.3               | 24.4 - 28.9          |
| Beach 5    | -42.992724 | 147.52394 | 1.65              | 14.6              | 4.9 - 5.9            |
| Olivine    | -38.006    | 142.793   | -                 | -                 | -                    |
| Steel slag | -33.01     | 137.589   | -                 | -                 | -                    |

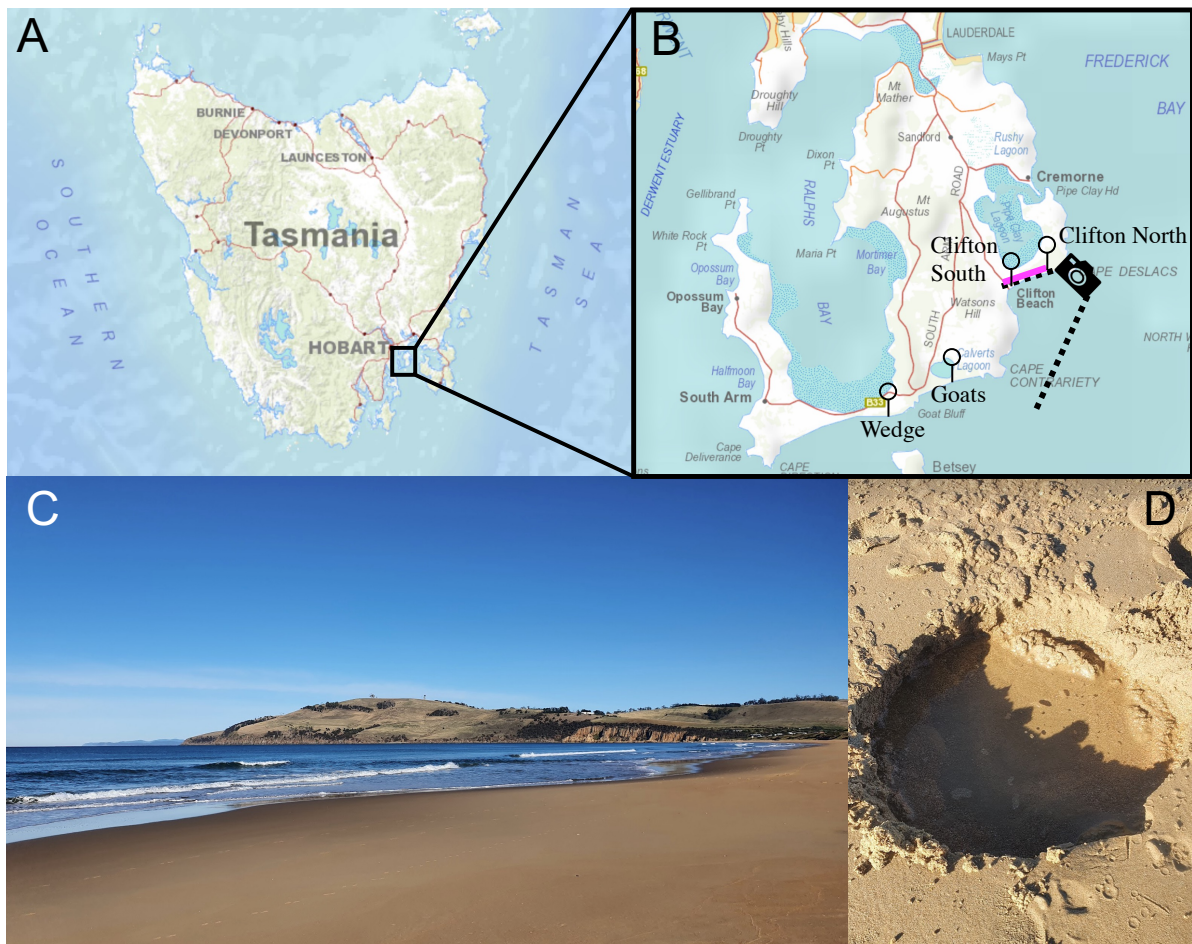

28

29 **Figure S1.** Locations of the beach transects and beach sand sampling in Tasmania. (A) Map  
 30 of Tasmania with (B) enlarged map of the Southarm region south of Hobart. The needles  
 31 show locations with names of the beach transects shown in Fig. 2 of the main text. The pink  
 32 line along Clifton Beach shows the part of the beach from where sand samples (Sand 1-5)  
 33 were collected for incubation experiments. The camera symbol illustrates the position from  
 34 where the picture shown in panel (C) was taken. (D) One of the holes that was dug to sample  
 35 seawater just above the swash zone, i.e. the first sample location along the transects from the  
 36 beach towards 150-200 m offshore. The two screenshots of the maps were reproduced with  
 37 the permission of the Environment Heritage and Land Division, Department of Natural  
 38 Resources and Environment Tasmania, © State of Tasmania.

39

40

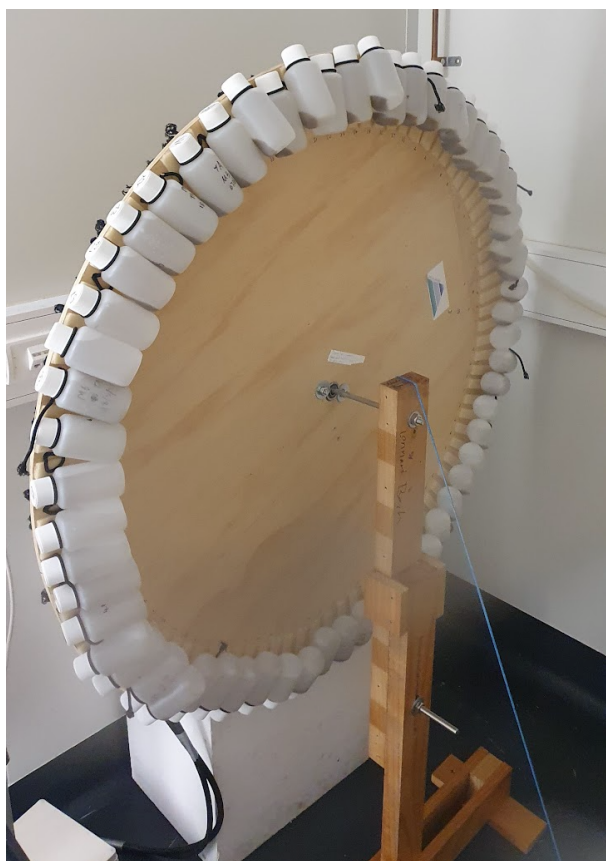

41

42 **Figure S2.** The plankton wheel used for experiments 1, 2, and 3. The picture shows the  
43 plankton wheel with incubation bottles mounted on it.

44

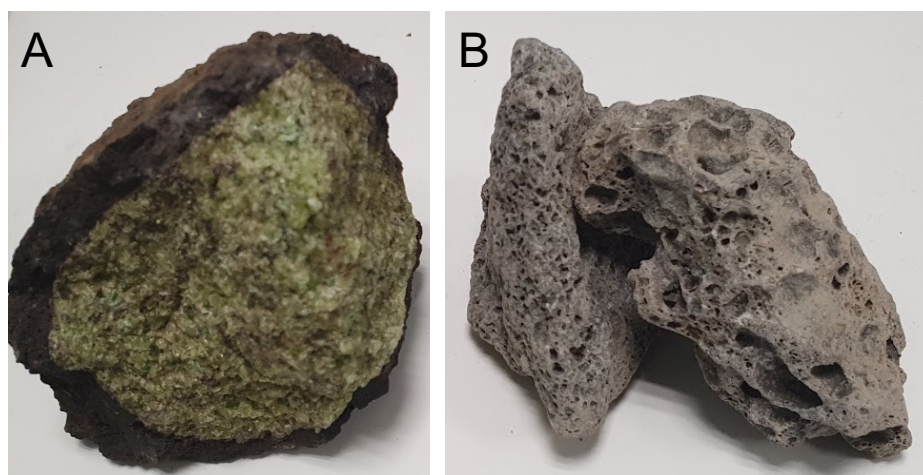

45

46 **Figure S3.** Raw material of olivine from Mortlake, Victoria, Australia (A) and steel slag  
47 from Whyalla, South Australia, Australia (B) before their crushing to powder.

48

49

50

51

52  
53  
54  
55

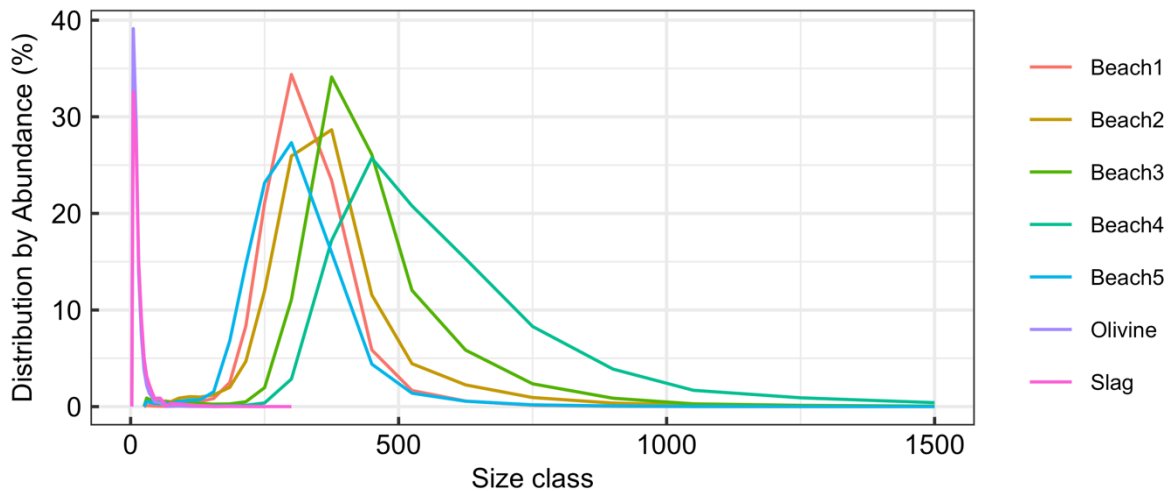

56  
57  
58  
59  
60

**Figure S2.** Size distribution of particles in beach sand and ground olivine/slag mineral used for incubations. Please note that distribution by abundance shows in which size class most of the particles occur but does not reflect the size class in which most of the mass is accumulated.
