# Supplementary material for: The additionality problem of Ocean Alkalinity Enhancement
Source: Copernicus journal article supplement (doi:10.5194/bg-2023-122), 2023-08-07
Supplement: Supplementary file [file bg-2023-122-RC1-supplement.pdf]

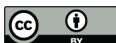

# 1 **The additionality problem of Ocean Alkalinity Enhancement**

2

3 Lennart T. Bach

4

5 Institute for Marine and Antarctic Studies, University of Tasmania, Hobart, TAS, Australia.

6

7 *Correspondence to:* Lennart T. Bach (Lennart.bach@utas.edu.au)

8

9

10 **Abstract.** Ocean Alkalinity Enhancement (OAE) is an emerging approach for atmospheric carbon dioxide  
11 removal (CDR). The net climatic benefit of OAE depends on how much it can increase carbon sequestration  
12 relative to a baseline state without OAE. This so-called ‘additionality’ can be calculated as:

13

14

$$\text{Additionality} = C_{\text{OAE}} - \Delta C_{\text{baseline}}$$

15

16 So far, feasibility studies on OAE have mainly focussed on enhancing alkalinity in the oceans ( $C_{\text{OAE}}$ ) but not  
17 primarily how such anthropogenic alkalinity would modify the natural alkalinity cycle ( $\Delta C_{\text{baseline}}$ ). Here, I present  
18 incubation experiments where materials considered for OAE (sodium hydroxide, steel slag, olivine) are exposed  
19 to beach sand to investigate the influence of anthropogenic alkalinity on natural alkalinity sources and sinks. The  
20 experiments show that anthropogenic alkalinity can strongly reduce the generation of natural alkalinity, thereby  
21 reducing additionality. This is because the anthropogenic alkalinity increases the calcium carbonate saturation  
22 state, which reduces the dissolution of calcium carbonate from sand, a natural alkalinity source. I argue that this  
23 ‘additionality problem’ of OAE is potentially widespread and applies to many marine systems where OAE  
24 implementation is considered – far beyond the beach scenario investigated in this study. However, the problem  
25 can potentially be mitigated by dilute dosing of anthropogenic alkalinity into the ocean environment, especially  
26 at hotspots of natural alkalinity cycling such as in marine sediments. Understanding a potential slowdown of the  
27 natural alkalinity cycle through the introduction of an anthropogenic alkalinity cycle will be crucial for the  
28 assessment of OAE.

29

## 30 **1. Introduction**

31

32 Keeping global warming between 1.5 to 2°C requires rapid reduction of greenhouse gas emissions and gigatonne-  
33 scale atmospheric carbon dioxide removal (CDR), using a portfolio of terrestrial and marine CDR methods  
34 (Nemet et al., 2018). Ocean alkalinity enhancement (OAE) is considered as an important CDR method of the  
35 marine portfolio (Hartmann et al., 2013). OAE can be achieved through a variety of geochemical and  
36 electrochemical processes (Renforth and Henderson, 2017). All of them enhance surface ocean alkalinity to  
37 reduce the hydrogen ion ( $\text{H}^+$ ) concentration in seawater (i.e. increase pH). This reduction in  $[\text{H}^+]$  causes a shift in  
38 the carbonate chemistry equilibrium:

39

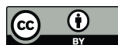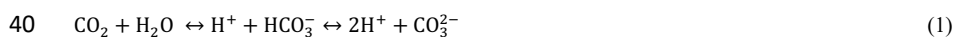

41

42 from  $\text{CO}_2$  on the left towards bicarbonate ( $\text{HCO}_3^-$ ) and carbonate ion ( $\text{CO}_3^{2-}$ ) on the right. The associated reduction  
43 of the  $\text{CO}_2$  partial pressure in seawater ( $p\text{CO}_2$ ) enables atmospheric  $\text{CO}_2$  influx into the oceans (or reduces  $\text{CO}_2$   
44 outflux if  $p\text{CO}_2 > \text{atmospheric } p\text{CO}_2$ ). This transfer (retention) of atmospheric  $\text{CO}_2$  into the ocean leads to an  
45 increase of the dissolved inorganic carbon (DIC) concentration in seawater:

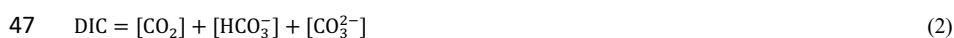

48

49 Among the widely discussed OAE approaches are coastal enhanced weathering and electrolysical acid removal  
50 (Eisaman et al., 2023). Coastal Enhanced Weathering achieves alkalinity increase via the addition of pulverized  
51 alkaline rocks like limestone, olivine, or alkaline industrial products like steel slag to coastal environments (Feng  
52 et al., 2017; Harvey, 2008; Meysman and Montserrat, 2017; Renforth, 2019; Schuiling and Krijgsman, 2006). In  
53 the case of limestone, alkalinity enhancement and CDR are generated through the dissolution of e.g.  $\text{CaCO}_3$ :

54

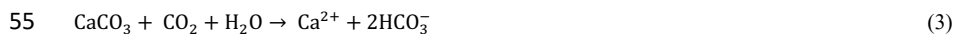

56

57 For olivine, alkalinity enhancement and CDR are driven predominantly by the dissolution of Forsterite ( $\text{Mg}_2\text{SiO}_4$ ):

58

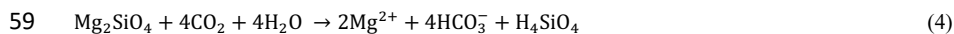

60

61 For steel slags, the predominant source for alkalinity contained within the material are hydroxides such as calcium  
62 oxide ( $\text{CaO}$ ) (Shi, 2004). Here, the net reaction of OAE and associated CDR is:

63

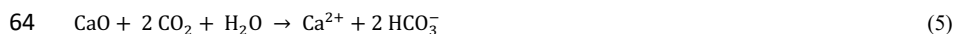

65

66 Electrolysical OAE is somewhat different from the above approaches since no materials are added to  
67 seawater. Instead, water is split into  $\text{H}^+$  and a hydroxide ion ( $\text{OH}^-$ ) using electrical energy and electrolysical  
68 membranes (de Lannoy et al., 2018).  $\text{H}^+$  is captured as hydrochloric acid whilst  $\text{OH}^-$  is captured as sodium  
69 hydroxide ( $\text{NaOH}$ ). The hydrochloric acid needs to be utilised, neutralized in deep ocean sediments, or stored in  
70 save reservoirs outside the ocean (Eisaman et al., 2018; Tyka et al., 2022).  $\text{NaOH}$  is enriched in the processed  
71 seawater, which is released back into the surface convert  $\text{CO}_2$  into  $\text{HCO}_3^-$  (Eisaman et al., 2018; Tyka et al., 2022):

72

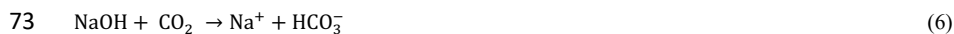

74

75 A critical side-effect of OAE is the associated increase in  $\text{CO}_3^{2-}$  concentrations, which comes through the shift in  
76 the marine carbonate equilibrium through  $\text{H}^+$  absorption (see above). This increase elevates the saturation state  
77 for calcium carbonate ( $\Omega_{\text{CaCO}_3}$ ), the metric which determines the solubility of  $\text{CaCO}_3$  in seawater.  $\Omega_{\text{CaCO}_3}$  is defined  
78 as:

79

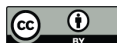

80 
$$\Omega_{\text{CaCO}_3} = \frac{[\text{Ca}^{2+}]_{\text{sw}} \times [\text{CO}_3^{2-}]_{\text{sw}}}{K_{\text{sp}}} \quad (7)$$

81

82 where  $[\text{Ca}^{2+}]_{\text{sw}}$  and  $[\text{CO}_3^{2-}]_{\text{sw}}$  are calcium ion ( $\text{Ca}^{2+}$ ) and  $\text{CO}_3^{2-}$  concentration in seawater and  $K_{\text{sp}}$  is the  
83 empirically determined solubility product (Mucci, 1983).  $K_{\text{sp}}$  differs for different crystal forms of  $\text{CaCO}_3$ . It is  
84 higher for Aragonite than for Calcite, meaning Aragonite is more soluble (Mucci, 1983). Aragonite (Ara) and  
85 Calcite (Cal) precipitation is thermodynamically favoured when  $\Omega_{\text{Ara}}$  and  $\Omega_{\text{Cal}}$  are  $\geq 1$ .  $\text{CaCO}_3$  precipitation is of  
86 high relevance for the assessment of OAE as the drawdown of  $\text{CO}_3^{2-}$  through precipitation reduces alkalinity,  
87 shifts the carbonate chemistry equilibrium (eq. 1) towards  $\text{CO}_2$  and thus counters the CDR efficiency of OAE  
88 (Fuhr et al., 2022; Hartmann et al., 2023; Moras et al., 2022).

89 Logistical constraints suggest that OAE would at least initially more likely to be conducted in coastal  
90 environments (He and Tyka, 2023; Lezaun, 2021; Renforth and Henderson, 2017). Here, alkalinity-enhanced  
91 seawater would likely be in contact with marine sediments (Feng et al., 2017; Harvey, 2008; Meysman and  
92 Montserrat, 2017). The highly abundant particles in marine sediments can serve as nuclei for  $\text{CaCO}_3$  precipitation  
93 thereby catalysing alkalinity loss when  $\Omega_{\text{CaCO}_3}$  is  $\geq 1$  (Morse et al., 2003; Zhong and Mucci, 1989). This constitutes  
94 a problem for OAE because alkalinity-enhanced seawater with its high  $\Omega_{\text{CaCO}_3}$  is then exposed to particles that  
95 catalyse precipitation. Indeed, recent studies have demonstrated that this particle-catalysed precipitation can  
96 rapidly reduce alkalinity, with the degree and rate of alkalinity reduction depending on the amount of alkalinity  
97 added and the particle concentrations (Fuhr et al., 2022; Hartmann et al., 2023; Moras et al., 2022).

98 Particle-catalysed  $\text{CaCO}_3$  precipitation has received significant consideration as a loss term for OAE efficiency  
99 (Fuhr et al., 2022; Hartmann et al., 2013, 2023; Moras et al., 2022; Renforth and Henderson, 2017). However,  
100 there is another complication associated with OAE near sediments, which has to the best of my knowledge not  
101 been considered so far. Sediments can not only provide precipitation nuclei but also constitute natural alkalinity  
102 sources, for example via dissolution of  $\text{CaCO}_3$  or other carbonates.

103 Sandy beaches are often rich in biogenic carbonates. They can also be rich in organic matter thereby  
104 creating environments of high respiratory  $\text{CO}_2$ . Accordingly,  $\Omega_{\text{CaCO}_3}$  is low close to the sediments or within pore  
105 waters and  $\text{CaCO}_3$  dissolution is favoured (Liu et al., 2021; Perkins et al., 2022; Reckhardt et al., 2015). This form  
106 of natural alkalinity formation via  $\text{CaCO}_3$  dissolution sequesters respired  $\text{CO}_2$  which may have otherwise be  
107 released into the atmosphere (Aller, 1982; Fakhraee et al., 2023; Krumins et al., 2013; Saderne et al., 2021). OAE  
108 within these naturally low  $\Omega_{\text{CaCO}_3}$  environments could have two effects. First, it would have the desired effect of  
109 consuming  $\text{H}^+$  and increasing  $\text{CO}_2$  sequestration via the generation of anthropogenic alkalinity (eqs. 2-4). Second,  
110 the consumption of  $\text{H}^+$  would increase  $\Omega_{\text{CaCO}_3}$ , which could reduce the dissolution of  $\text{CaCO}_3$  and thus reduce  
111 natural  $\text{CO}_2$  sequestration since less natural alkalinity is produced. Due to this second effect, the first (desired)  
112 effect of  $\text{CO}_2$  sequestration may be significantly reduced. Accordingly, the net gain in  $\text{CO}_2$  sequestration would  
113 be lower than one would have hoped for.

114 The concept “additionality” describes the net gain in  $\text{CO}_2$  sequestration achieved through the  
115 implementation of a CDR method. It can be defined in simple terms as:

116

117 
$$\text{Additionality} = C_{\text{OAE}} - \Delta C_{\text{baseline}} \quad (8)$$

118

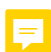

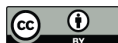

119 where  $C_{OAE}$  is the  $CO_2$  sequestration achieved through OAE, and  $\Delta C_{baseline}$  is the change in the baseline  $CO_2$   
120 sequestration through the implementation of OAE.

121 This study aims to reveal and describe how anthropogenic alkalinity affects natural alkalinity release. I  
122 present some observational data and three experiments where 3 types of anthropogenic alkalinity sources (NaOH,  
123 steel slag, olivine) are exposed to a natural alkalinity source and sink (beach sand) to investigate their interactions.  
124 Afterwards, I examine these interactions (termed “additionality problem”), discuss their relevance, and how it  
125 could be mitigated.

126

## 127 2. Methods

128

### 129 2.1. Carbonate chemistry and dissolved silicate transects along Southern Tasmanian beaches

130

131 The project was initialised with near-shore alkalinity, pH, and dissolved silicate (DSi) transects from the swash  
132 zone to ~200 m offshore on 4 beach locations (Clifton South, Clifton North, Goats, Wedge) near Hobart  
133 (Tasmania). Goal of these transects was to determine whether the beaches are detectable alkalinity sinks or sources  
134 and to inform the incubation experiments. An overview of the sampled beaches with approximate conditions and  
135 exact coordinates is provided in Table S1 and Fig. S1.

136 Samples for alkalinity and DSi were taken by filling 200 mL seawater from 0.2 m depth into a  
137 polyethylene (PE) bottle. Samples for pH were collected in a 60 mL polystyrene (PS) jars filled and closed at 0.2  
138 m depth. Both the PE bottles and the PS jars were pre-rinsed with sample. The sample closest to shore was taken  
139 in the swash zone at the spot where a wave reached highest within ~5 minutes of observation. A ~0.2 m deep hole  
140 was dug (Fig. S1) and water was collected from the groundwater with a 60 mL syringe. The second sample was  
141 from the upper part of the swash zone where waves pushed water up the beach. Samples further out were taken  
142 from within the wave breaking zone to about 50-100 m beyond the wave breaking zone. Samples were taken by  
143 walking into the water to the point it became too deep and a surfboard was used as sampling vehicle.

144 The samples were transported back to the beach where pH was measured immediately (i.e. within 15  
145 minutes after sampling) as described in section 2.4. Alkalinity and DSi samples were filtered after pH  
146 measurements with a 0.22 syringe filter (nylon membrane) into a 125 mL PE bottle (alkalinity) or 60 mL PS  
147 plastic jar (DSi). Both containers, the syringe, and the syringe filter were pre-rinsed with sample.

148

### 149 2.2. Laboratory experiments

150

#### 151 2.2.1. Experiment 1: Replicated mineral dissolution assays to monitor interaction between 152 beach sand and weathering minerals

153

154 Experiment 1 was designed to investigate the interaction between 4 different beach sands and alkaline minerals  
155 during the incubation in seawater. The experiment required 60 HDPE bottles, each with a volume of 125 mL.  
156 These 60 bottles were thoroughly cleaned with double-deionised water and dried at 60°C. Twelve bottles were  
157 filled with sand from one of the 4 sampling locations (section 2.3.), respectively (totalling 48 bottles). Another  
158 set of 12 bottles were not filled with sand. This yielded 5 sets of 12 bottles (Fig. 1). Of each set, 3 bottles remained



159 without further addition, 3 received 51.3  $\mu\text{L}$  of 1 molar NaOH, 3 received 0.0065 g of ground steel slag, and 3  
160 received 1 g of ground olivine (Fig. 1; sand, steel slag, and olivine properties were determined as described in  
161 section 2.3.). The 48 bottles that contained sand were filled with 10 g of sand if slag or NaOH was added or 9 g  
162 of sand if olivine was added. This was done so that the weights of added sand plus alkalinity feedstock was always  
163  $\sim 10$  g.

164 Once the solid components were added, each bottle was filled with 120 (+/-4) g of seawater ( $S=35 \pm 2$ , alkalinity  
165 = 2259.7  $\mu\text{mol/kg}$ ) collected in July 2022 in the Derwent Estuary near Taroona. Salinity and pH of the seawater  
166 was determined a few minutes before transfer into the incubation bottles with a Metrohm 914 pH/conductivity  
167 meter as described in section 2.4. The transfer of the seawater into the incubation bottles took 30 minutes in total  
168 (please note that in the case of NaOH additions, seawater was added to the bottles before 51.3  $\mu\text{L}$  of 1 molar  
169 NaOH was added). The incubation bottles were immediately mounted on plankton wheel (1.06 m diameter, 2  
170 rounds per minute), which was placed in a temperature-controlled room set to 15°C (Fig. S2). The plankton wheel  
171 kept the various mixtures of sand, alkalinity source, and seawater moving inside the bottles. The experiment  
172 commenced at 16:00 on the 17<sup>th</sup> of August, 2022.

173 After  $\sim 6.8$  days (24<sup>th</sup> of August), bottles were consecutively removed from the plankton wheel in random order  
174 between 8:00 and 15:30. pH was measured inside the bottle with a pH electrode, directly after a bottle was taken  
175 off the plankton wheel. Afterwards, the alkalinity sample was filtered with a syringe through a 0.2  $\mu\text{m}$  nylon filter  
176 into a dry and clean 125 mL HDPE bottle and stored in the dark at 7°C.

177

### 178 2.2.2. Experiment 2: Alkalinity formation at Omega gradients

179

180 Experiment 2 was designed to investigate whether a decline of  $\Omega_{\text{CaCO}_3}$  enhances the formation of natural alkalinity  
181 via  $\text{CaCO}_3$  dissolution and how anthropogenic alkalinity sources (olivine, slag, NaOH) influence this process. The  
182 experiment required 60 HDPE bottles (125 mL) cleaned with acid and double-deionised water (note that acid was  
183 used in Experiment 2 to make sure all remnants from Experiment 1 were washed out of the bottles). All 60  
184 incubation bottles were filled with sand from Clifton Beach (section 2.4.). The treatments were then set up as  
185 follows: Twelve bottles were filled only with 10 g of sand; Twelve with 10 g of sand and 0.006515 (+/-0.00007)  
186 g steel slag; Twelve with 9 g of sand and 1 (+/-0.002) g of olivine; Eight with 10 g of sand at “un-equilibrated”  
187 NaOH addition; Sixteen with 10 g of sand at “equilibrated” NaOH addition (Fig. 1).

188 For each treatment, a gradient in seawater  $\text{CO}_2$  concentrations was established from bottle 1 (lowest  $\text{CO}_2$ ) to bottle  
189 8-16 (highest  $\text{CO}_2$ ). This was achieved with the following approach: A batch of seawater ( $S= 35 \pm 0.2$ , alkalinity =  
190 2266.8  $\mu\text{mol/kg}$ ) was collected in November 2022 in the Derwent Estuary near Taroona. About 0.3L of the batch  
191 was bubbled with pure  $\text{CO}_2$  gas for about 5 minutes to generate highly  $\text{CO}_2$ -enriched seawater. Another  $\sim 7\text{L}$  of  
192 the batch was used as source water to fill the incubation bottles. pH and temperature were measured in this batch  
193 prior to filling the incubation bottles. The low  $\text{CO}_2$  incubation bottles (bottle 1 in the sequence from e.g. 1 to 12,  
194 Fig. 1) were then filled first. Afterwards, about 20 mL of the  $\text{CO}_2$ -enriched water was added to the batch, shaken  
195 thoroughly to mix it and the pH and temperature were measured again. Once a stable pH/temperature reading was  
196 achieved, the next bottles (bottle 2) were filled. This procedure was repeated until all bottles in a treatment were  
197 filled with an increasing  $\text{CO}_2$  concentration. For the equilibrated and un-equilibrated NaOH treatments, I followed  
198 the same procedure but separate 0.3L and 7L batches were used for the  $\text{CO}_2$  enrichment that had previously been



199 amended with NaOH to elevate alkalinity from 2266.8 to 2757.4  $\mu\text{mol/kg}$  prior to filling the incubation bottles.  
200 All 60 bottles were filled with 120  $\pm$  4 g of seawater and immediately mounted on the plankton wheel (2<sup>nd</sup> of  
201 December, 2022; 17:00) under the same conditions as in Experiment 1 (i.e. 15°C, 2 rounds per minute, Fig. S2).  
202 After  $\sim$ 6.8 days (9<sup>th</sup> of December), bottles were removed from the plankton wheel between 9:00 and 16:00. pH  
203 and alkalinity were sampled as described in section 2.2.1.

204

### 205 2.2.3. Experiment 3: pH dependency of alkalinity formation from slag and olivine

206

207 Experiment 3 was designed to investigate whether a lower seawater pH would promote alkalinity formation from  
208 steel slag and olivine.

209 The experiment required 12 new HDPE bottles (125 mL) cleaned with double-deionised water and dried  
210 thereafter. Six of the 12 bottles were filled with 0.00644 ( $\pm$ 0.00007) g steel slag and the other six with 1.0003  
211 ( $\pm$ 0.002) g of olivine. Three slag and three olivine bottles were filled with seawater from the same seawater source  
212 as used in Experiment 2 ( $S=35\pm 0.2$ , alkalinity=2263.2  $\mu\text{mol/kg}$ ,  $\text{pH}_T = 7.82$ ). pH and temperature were measured  
213 prior to filling the bottles with seawater (section 2.4.). Afterwards, the  $\sim$ 2L seawater batch was amended with  
214 about 80 mL of  $\text{CO}_2$ -enriched seawater as explained in section 2.2.2. This enrichment lowered the  $\text{pH}_T$  (total  
215 scale) from 7.82 to 6.846. This low  $\text{pH}_T$  (high  $\text{CO}_2$ ) seawater was used to fill the other 3 slag and olivine incubation  
216 bottles. The 12 bottles with 122.8 ( $\pm$ 0.15) g of seawater were immediately mounted on the plankton wheel (Fig.  
217 S2) after filling (16<sup>th</sup> of December, 2022; 16:40) under the same conditions as in Experiment 1 and 2 (i.e. 15°C,  
218 2 rounds per minute).

219 After  $\sim$ 6.8 days (23<sup>rd</sup> of December), the 12 bottles were randomly removed from the plankton wheel between 9:00  
220 and 11:00. pH and alkalinity were sampled as described in section 2.2.1.

221

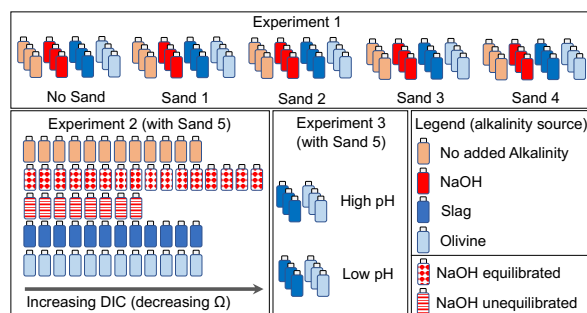

222

223 **Figure 1.** Design of Experiments 1, 2, and 3. Bottles represent treatments with incubation of seawater, sand, and  
224 alkalinity sources (color code represents alkalinity source). In Experiment 2, NaOH was used as alkalinity source  
225 in two explicit scenarios as described in section 2.2.2.

226

### 227 2.3. Preparation and characterization of weathering minerals and beach sand

228

229 In total, 5 sand samples (0.5-1kg) were collected for Experiments 1 and 2 at Clifton Beach, Tasmania (Fig. S1,  
230 Table S1). Sampling permission was granted by the Department of Natural Resources and Environment (Authority  
231 No. ES 22314). Wet sand was sampled on the upper end of the swash zone and stored in zip bags at 15°C. Samples



232 1-4 were used for Experiment 1, ~24 hours after sampling while sample 5 was used for Experiment 2, ~72 hours  
233 after sampling.

234 Olivine rocks were sourced from the Mount Shadwell Quarry in Mortlake (Australia, Table S1). Basic oxygen  
235 slag (hereafter just called slag) was sourced from the Liberty Primary Steel – Whyalla Steelworks (Australia,  
236 Table S1). Olivine rocks and slag (Fig. S3) were crushed with a hydraulic crusher into smaller pieces of about 10  
237 mm and then milled with a ring mill in a chrome milling pot. Milled slag and olivine were sieved, first with a 250  
238  $\mu\text{m}$  sieve and then with a 150  $\mu\text{m}$  sieve. The fractions retained on the 150  $\mu\text{m}$  sieve were used for experiments.

239 Wet and dry weight of the sand used for laboratory experiments was determined by weight difference of a wet  
240 and a dry sample. The wet sample (~80 g) was put into a clean plastic jar and dried for 24-72 hours. The particle  
241 size spectra of the 5 dried sand samples as well as slag and olivine mineral were determined with a Sympatec  
242 QICPIC particle imager.

243 For total particulate carbon (TPC) and particulate organic carbon (POC) analyses, dried sand samples were milled  
244 for 12 minutes in a Retsch MM200 ball mill. Between 4-10 mg of each of the pulverized sand samples were  
245 weighed into 10 tin cups for TPC or 10 silver cups for POC (2 TPC and POC replicates for each sample). The  
246 POC samples were moisturized with 50 $\mu\text{L}$  of MilliQ water, placed for 18 hours in a dessicator that contained 36%  
247 HCl to remove all carbonates and then dried. TPC and POC samples were analysed for carbon content using a  
248 Thermo Finnigan EA 1112 Series Flash Elemental Analyser. Particulate inorganic carbon (PIC) content of the  
249 samples was then calculated as the difference between TPC and POC. Percent content of carbonates was estimated  
250 by multiplying % PIC content by the molecular weight of  $\text{CaCO}_3$  (100 g/mol) and  $\text{MgCO}_3$  (84.3 g/mol) for upper  
251 and lower estimates.

252

#### 253 **2.4. Carbonate chemistry, salinity, and dissolved silicate measurements**

254

255 pH was determined potentiometrically using a Metrohm 914 pH meter following Standard Operation Procedure  
256 6a described in (Dickson et al., 2007) but omitting the test for ideal Nernst behaviour of the electrode (ideal Nernst  
257 behaviour was assumed). A new pH electrode (Metrohm Aquatrode Plus) was calibrated on the total pH scale  
258 ( $\text{pH}_T$ ) with certified reference material (CRM) TRIS buffer (batch #37), provided by Prof. Andrew Dickson's  
259 laboratory. The calibration procedure for the relevant temperature range (~8 – 18°C) followed the exact workflow  
260 as described by (Ferderer et al., 2022). Precision of the pH measurement was assumed to be  $\pm 0.015$  based on  
261 experience with the probe.

262 alkalinity was determined in an open cell titration following (Dickson et al., 2003). Samples were measured in  
263 duplicate with a Metrohm 811 titration unit equipped with a Metrohm Aquatrode Plus. Alkalinity was calculated  
264 from titration curves using the Calculate function of PyCO2sys (Humphreys et al., 2020). The difference in  
265 alkalinity between duplicate titrations of the sample was on average 1.95  $\mu\text{mol}/\text{kg}$  and >75% were within 4  
266  $\mu\text{mol}/\text{kg}$  (N=185), which was assumed to be the precision of the measurement ( $\pm 2 \mu\text{mol}/\text{kg}$ ). Accuracy was  
267 controlled by correcting alkalinity values with CRM provided by A.G. Dickson's laboratory. Alkalinity was  
268 measured within maximally 20 days after sampling.

269 Salinity was measured with a Metrohm conductivity probe with a PT1000 temperature sensor connected to a  
270 Metrohm 914 conductivity meter. The probe was calibrated with DIC/alkalinity CRM from A.G. Dickson's  
271 laboratory for which a salinity of 33.464 has been reported (CRM batch 200). Conductivity was measured in



272 mS/cm<sup>2</sup> and salinity was subsequently calculated on the practical salinity scale following Lewis and Perkins  
273 (1978), following the workflow described by (Moras et al., 2022). A relatively low precision of +/- 0.2 was  
274 determined from repeat measurements.

275 Si concentrations for beach transects were measured 18 hours after sampling following Hansen and Koroleff  
276 (1999). No Si measurements were conducted for Experiments 1-3.

277

### 278 **2.5. Carbonate chemistry calculations**

279

280 Carbonate chemistry conditions were calculated with the “carb function” in Seacarb (Gattuso et al., 2021), with  
281 pH<sub>r</sub>, alkalinity, salinity, temperature, phosphate and silicate concentrations as input variables, stoichiometric  
282 equilibrium constants from Lueker et al. (2000), and default settings for the other equilibrium constants. Si was  
283 not measured due to volume limitations so I assumed a values of 50 μmol/kg at the end of the experiments, when  
284 either sand, olivine, or slag were incubated. Likewise, phosphate was not measured and I assumed 2 μmol/kg at  
285 the end of the experiments when slag was incubated. These Si and phosphate releases were based upon previous  
286 trials. Note, however, that concentrations of Si and phosphate within these ranges have negligible impact on  
287 calculated carbonate chemistry parameters (e.g. pCO<sub>2</sub> changes by ~1 μatm when Si is assumed to be 0 instead of  
288 50 μmol/kg).

289 Propagated errors in derived carbonate chemistry parameters (e.g., DIC) were calculated with the  
290 “errors” function in Seacarb using measurement precisions described in section 2.4. for pH (±0.015), alkalinity  
291 (±2 μmol/kg), and salinity (±0.2), default uncertainties for equilibrium constants and temperature, and when  
292 applicable (see above) ±50 μmol/kg for silicate and ±2 μmol/kg for phosphate.

293

### 294 **2.6. Calculations of the CO<sub>2</sub> uptake ratio (η<sub>CO2</sub>) for carbonate and non-carbonate alkalinity** 295 **sources**

296

297 The atmospheric CO<sub>2</sub> uptake ratio for OAE (η<sub>CO2</sub>) was defined as the number of moles DIC absorbed per number  
298 of moles alkalinity added (Tyka et al., 2022). η<sub>CO2</sub> was shown to range roughly between 0.75 and 0.9 mol:mol in  
299 the surface ocean (Schulz et al., 2023; Tyka et al., 2022). However, this η<sub>CO2</sub> range only applies for alkalinity  
300 source materials that exclusively increase alkalinity without a concomitant increase in DIC when they are added  
301 to seawater (Alk<sub>non-carbonate</sub>). Such sources comprise for example NaOH, slag, and olivine. The estimated range  
302 does not apply when all or fractions of the added alkalinity comes from carbonates (Alk<sub>carbonate</sub>), since CaCO<sub>3</sub>  
303 dissolution contributes 2 moles of alkalinity and 1 mole of (non-atmospheric) DIC when they dissolve.

304 The dependency of η<sub>CO2</sub> on the relative contribution of Alk<sub>carbonate</sub> and Alk<sub>non-carbonate</sub> was calculated as:

305

$$306 \eta_{CO_2} = \frac{DIC_{equilibrated} - \left(\frac{Alk_{carbonate}}{2}\right) - DIC_{initial}}{Alk_{non-carbonate} + Alk_{carbonate} - Alk_{initial}} \quad (9)$$

307

308 Where DIC<sub>initial</sub> and Alk<sub>initial</sub> are DIC and alkalinity in seawater before alkalinity was increased, assuming a  
309 seawater pCO<sub>2</sub> in equilibration with the atmosphere. DIC<sub>equilibrated</sub> is the amount of DIC from the environment (e.g.  
310 from the atmosphere) that can be stored in seawater after the increase of Alk<sub>carbonate</sub> and Alk<sub>non-carbonate</sub>, assuming





311 seawater  $p\text{CO}_2$  in equilibrium with the atmosphere.  $\eta_{\text{CO}_2}$  was first calculated for a theoretical case where  $\text{Alk}_{\text{initial}}$   
312 was  $2350 \mu\text{mol/kg}$  and  $\text{DIC}_{\text{initial}}$  was calculated for the surface ocean ( $15^\circ\text{C}$ ,  $S = 35$ , carbonate chemistry constants  
313 as in section 2.5), assuming a  $p\text{CO}_2$  of  $420 \mu\text{atm}$ .  $\text{Alk}_{\text{carbonate}}$  and  $\text{Alk}_{\text{non-carbonate}}$  were then varied in a range of  
314 scenarios (from 0 to 100%  $\text{Alk}_{\text{carbonate}}$ ) to increase the sum of them by  $1 \mu\text{mol/kg}$ .  $\eta_{\text{CO}_2}$  was calculated for each  
315 scenario.

316 Next,  $\eta_{\text{CO}_2}$  was calculated specifically for Experiment 1 as follows: The increase of alkalinity ( $\Delta\text{Alkalinity}$ ) was  
317 higher in the NaOH and slag treatments when no sand was present compared to incubations with sand (section  
318 3.2).  $\Delta\text{Alkalinity}$  was very likely  $\text{Alk}_{\text{non-carbonate}}$  in all incubations while the reduced  $\Delta\text{Alkalinity}$  in the incubations  
319 with sand was likely due to secondary precipitation of carbonates (section 4.2.1). Based on these conclusions,  
320  $\eta_{\text{CO}_2}$  was estimated as:

321

$$322 \eta_{\text{CO}_2} = \frac{(\Delta\text{Alkalinity}_{\text{no-sand}} - \Delta\text{Alkalinity}_{\text{sand}}) \times 0.5 + \Delta\text{Alkalinity}_{\text{sand}} \times 0.86}{\Delta\text{Alkalinity}_{\text{no-sand}}} \quad (10)$$

323  where  $\Delta\text{Alkalinity}_{\text{no-sand}}$  and  $\Delta\text{Alkalinity}_{\text{sand}}$  are the changes in alkalinity measured in incubations without sand and  
324 with sand, respectively; 0.5 is the  $\eta_{\text{CO}_2}$  when  $\text{Alk}_{\text{non-carbonate}}$  is lost via the precipitation of carbonates where 2 moles  
325 of alkalinity and 1 mol of DIC are sequestered; 0.86 is the  $\eta_{\text{CO}_2}$  when all  $\Delta\text{Alkalinity}$  is  $\text{Alk}_{\text{non-carbonate}}$  under the  
326 conditions set up in the experiments (i.e.  $15^\circ\text{C}$ ,  $S=35$ ; see above). Please note that  $\Delta\text{Alkalinity}$  was higher in the  
327 olivine incubations when sand was present, which is opposite to the NaOH and slag incubations for reasons  
328 discussed in section 4.2.1. Therefore,  $\eta_{\text{CO}_2}$  was calculated assuming all  $\Delta\text{Alkalinity}$  was  $\text{Alk}_{\text{non-carbonate}}$  for the  
329 olivine incubations (i.e.  $\eta_{\text{CO}_2} = 0.86$ ). For the incubations without an added alkalinity source all  $\Delta\text{Alkalinity}$  was  
330 assumed to be  $\text{Alk}_{\text{carbonate}}$  so that  $\eta_{\text{CO}_2}$  was 0.36.

331  $\eta_{\text{CO}_2}$  was also specifically calculated for Experiment 2. This required knowledge of how much of the measured  
332  $\Delta\text{Alkalinity}$  was contributed by  $\text{Alk}_{\text{carbonate}}$  and  $\text{Alk}_{\text{non-carbonate}}$ . In the treatments where only sand was incubated,  
333 alkalinity and DIC increased roughly in a 2:1 molar ratio over the course of the experiment (i.e.  $\Delta\text{Alkalinity}:\Delta\text{DIC}$   
334 = 2:1 mol:mol). Thus, it can be assumed that the vast majority of the measured alkalinity increase is  $\text{Alk}_{\text{carbonate}}$ .  
335 In contrast, when sand was incubated with alkaline materials, alkalinity and DIC generally increased with a molar  
336 ratio that was  $>2:1$  because alkaline materials release alkalinity without a concomitant increase of DIC. Based on  
337 these constraints, we can roughly approximate the contribution of  $\text{Alk}_{\text{carbonate}}$  and  $\text{Alk}_{\text{non-carbonate}}$  to the measured  
338 alkalinity increase ( $\Delta\text{Alkalinity}$ ) as:

339

340

$$341 \% \text{Alk}_{\text{carbonate}} = \left( \frac{\Delta\text{Alkalinity}}{\Delta\text{DIC}} \right) / 2 \times 100 \quad (11)$$

342

343 Where  $\% \text{Alk}_{\text{carbonate}}$  is the percentage contribution of  $\text{Alk}_{\text{carbonate}}$  to  $\Delta\text{Alkalinity}$ . Based on eq. (11), a  
344  $\Delta\text{Alkalinity}:\Delta\text{DIC}$  of for example 8:1 mol:mol would suggest that 25% of the  $\Delta\text{Alkalinity}$  is  $\text{Alk}_{\text{carbonate}}$  and the  
345 other 75%  $\text{Alk}_{\text{non-carbonate}}$ .  $\text{Alk}_{\text{carbonate}}$  and  $\text{Alk}_{\text{non-carbonate}}$  were calculated with eq. 11 for all incubations in Experiment  
346 2 and this information was then used to calculate  $\eta_{\text{CO}_2}$  with eq. (10). Finally, the amount of DIC that can be stored  
347 in seawater due to an increase of  $\text{Alk}_{\text{carbonate}}$  and  $\text{Alk}_{\text{non-carbonate}}$  ( $\text{DIC}_{\text{OAE}}$ ) was calculated as:

348



349  $DIC_{OAE} = \eta_{CO_2} * \Delta\text{Alkalinity}$  (12)

350

351 for experiments 1 and 2.

352

### 353 2.7. Statistical analysis

354

355 Experiment 1 and 3 were analysed with a two-way analysis of variance (ANOVA) where either “sand” and  
356 “alkalinity source material” (Experiment 1) or “carbonate chemistry” and “alkalinity source material”  
357 (Experiment 3) were defined as independent variables. The dependent variables were the changes in carbonate  
358 chemistry (e.g.  $\Delta\text{Alkalinity}$ ) over the course of the incubations. Homogeneity of variance was assessed by visually  
359 inspecting if plotted model residuals vs. fitted values is scattering similarly around 0. Normality of the residuals  
360 was assessed by inspecting qqplots where theoretical quantiles plotted against standardized residuals should  
361 ideally resemble a straight line. Such a straight-line appearance (i.e. ideal normality) was not always given, so  
362 some datasets were rank-transformed. However, transformation did not improve normality substantially so that  
363 non-transformed data was used for all analyses. Statistical differences between individual treatments were  
364 assessed with a Tukey post-hoc. Significant differences were assumed when  $p < 0.05$ .

365 Experiment 2 was analysed by plotting  $\Delta\text{Alkalinity}$  for each alkalinity source material and sand against the  
366 increase in DIC that was established via additions of  $\text{CO}_2$ -saturated seawater (section 2.2.2). The data was fitted  
367 with the polynomial equation  $a*x^2+bx+c$ , where  $x$  is the amount of DIC added to each treatment and  $a$ ,  $b$ ,  $c$  are  
368 fit parameters. The curve fitted to the treatments where only sand was added was compared to the curves fitted to  
369 the treatments where sand and a certain alkalinity source were added.

370

## 371 3. Results

372

### 373 3.1. Beach transects

374

375 Beach transects consisted of 8-9 sampling points from the just above the swash zone to 150-220 m offshore at  
376 four locations (Table S1, Fig. S1). Alkalinity showed distinct patterns across the locations. At Clifton South and  
377 Wedge, alkalinity was higher in the swash zone than in the open water. This was particularly pronounced at Clifton  
378 South with a value of 2418  $\mu\text{mol/kg}$  relative to open water values of about 2300  $\mu\text{mol/kg}$  (Fig. 2A). At Goats  
379 Beach, no such alkalinity gradient was observed across the transect, while alkalinity was lower in the swash zone  
380 at Clifton North (Fig. 2A). Wedge differed to the other locations in that alkalinity was generally lower (~2160  
381 compared to ~2300  $\mu\text{mol/kg}$  in open water).

382  $\text{pH}_T$  was lowest in samples just above the swash zone at all four locations (Fig. 2B). The difference relative to  
383 open water was most pronounced at Clifton South with  $\text{pH}_T$  of 7.76 just above the swash zone compared to  
384 approximately 8.05 in the open water, while least pronounced at Goats. Gradients at Clifton North and Wedge  
385 were in between these two extremes.  $\text{pH}_T$  at Wedge was on average higher in the open water than at the other  
386 locations, i.e. 8.08 compared to 8.05 (Fig. 2B).

387  $\text{Si}(\text{OH})_4$  concentrations were highest in samples from just above the swash zone at all four locations (Fig. 2C).

388 The most pronounced gradient was observed at Clifton South, with  $\text{Si}(\text{OH})_4$  of 8.6  $\mu\text{mol/L}$  just above the swash



389 zone and  $\sim 1.6 \mu\text{mol/L}$  in open water. The least pronounced gradient was observed at Goats, and intermediate  
390 gradients at Clifton North and Wedge (Fig. 2C).  
391 Overall, the data shows consistency across the three parameters measured in that Clifton South showed most  
392 pronounced trends, Goats the least pronounced trends, and Clifton North and Wedge being in between (Fig. 2).

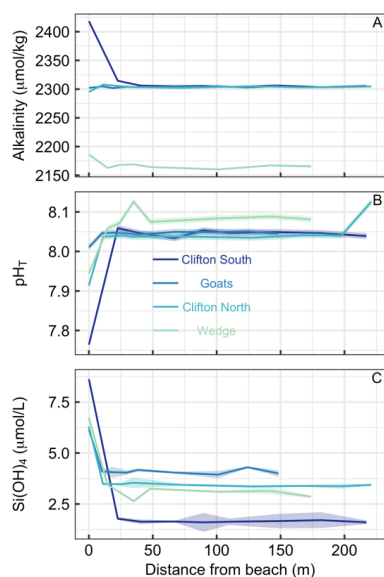

393  
394 **Figure 2.** Transects of (A) alkalinity, (B)  $\text{pH}_T$ , and (C)  $\text{Si(OH)}_4$  at four different beach locations in southern  
395 Tasmania (see Table S1 and Fig. S1 for locations). The first sampling was at the upper end of the swash zone and  
396 then 7-8 more samples were taken until 150-200 m offshore. Lines and shaded areas show averages and  
397 uncertainties, respectively.

398

399

### 3.2. Experiment 1

400

401 Alkalinity increased over the course of the 6.8 days in all treatments where alkaline materials were added (Fig.  
402 3). Changes in alkalinity ( $\Delta\text{Alkalinity}$ ) were between  $\sim 610\text{--}400 \mu\text{mol/kg}$  for the slag,  $\sim 420\text{--}290 \mu\text{mol/kg}$  for the  
403 NaOH, and  $280\text{--}370 \mu\text{mol/kg}$  for the olivine treatment. In contrast,  $\Delta\text{Alkalinity}$  changed very little (i.e.  $\Delta\text{Alkalinity}$   
404  $\leq 6 \mu\text{mol/kg}$ ) when no alkaline materials were added. (Please note that an important outlier was observed in Sand  
405 2 where  $\Delta\text{Alkalinity}$  was  $87.3 \mu\text{mol/kg}$  which will be discussed in section 4.3.). The two-way ANOVA revealed  
406 significant effects of (1) the type of sand, (2) the type of alkalinity source, and (3) the interaction of these two on  
407  $\Delta\text{Alkalinity}$  ( $p < 0.05$ ). For the slag and the NaOH treatment,  $\Delta\text{Alkalinity}$  was significantly higher when these were  
408 incubated with no sand but only small differences were observed across the four sand samples. In contrast,  
409  $\Delta\text{Alkalinity}$  was slightly lower in the olivine treatment when no sand was present during incubations although the  
410 difference was only significant relative to olivine incubated in Sand 4 (Fig. 3A).

411 Changes in  $\text{pH}_T$  ( $\Delta\text{pH}_T$ ) reflected the patterns described for  $\Delta\text{Alkalinity}$  (Fig. 3B).  $\Delta\text{pH}_T$  was highest in the slag  
412 and the NaOH treatment when no sand was added, while this difference between the presence and absence of sand  
413 was not observed for olivine.  $\Delta\text{pH}_T$  was slightly negative in treatments where no alkalinity source was added to



414 the incubated sand samples. The two-way ANOVA revealed significant effects of sand, alkalinity source and their  
415 interaction on  $\Delta\text{pH}_T$  ( $p < 0.05$ ).  
416  $\eta_{\text{CO}_2}$  was prescribed to be 0.36 when sand without an anthropogenic alkalinity source was incubated and 0.86 for  
417 olivine incubations (see section 2.6). Calculated  $\eta_{\text{CO}_2}$  for NaOH and slag treatments were slightly lower due to  
418 relatively lower  $\Delta\text{Alkalinity}$  in the presence of sand than without the presence of sand (Fig 3C). This relatively  
419 lower  $\Delta\text{Alkalinity}$  was most likely due to some of the  $\Delta\text{Alkalinity}$  was lost due to secondary precipitation of  
420 carbonates. Statistics are not provided for  $\eta_{\text{CO}_2}$  data because assumptions of the ANOVA model were heavily  
421 violated.  
422

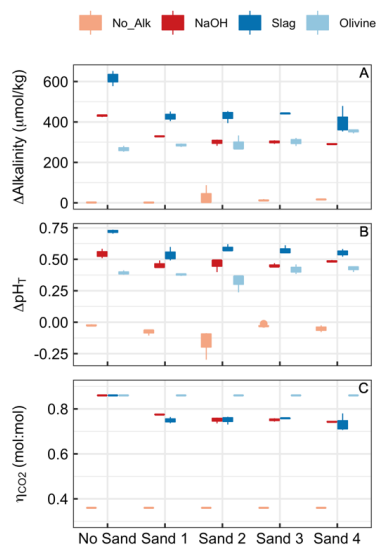

423  
424 **Figure 3.** Results of Experiment 1. Changes of (A) alkalinity and (B)  $\text{pH}_T$  from the beginning to the end of the  
425 6.8 days experiment. (C)  $\eta_{\text{CO}_2}$  at the end of the experiment. Boxplots are based on three replicates per treatment.  
426 Colours refer to the added alkalinity source (No\_Alk means no alkalinity source was added). The alignment on  
427 the x-Axis indicates if or which sand sample was present in the incubation bottles (“No Sand” means no Sand was  
428 added).

### 430 3.3. Experiment 2

431  
432 The additions of  $\text{CO}_2$ -enriched seawater established a gradient of increasing DIC and accordingly a decline in  
433  $\text{pH}_T$  and  $\Omega_{\text{Ara}}$ . The rationale for this setup was that beach sediments can contain high amounts of respiratory  $\text{CO}_2$   
434 so that anthropogenic alkalinity added to beaches has a high likelihood to be exposed to such high  $\text{CO}_2$  conditions  
435 (Liu et al., 2021; Perkins et al., 2022; Reckhardt et al., 2015). Fig. 4 shows  $\Delta\text{Alkalinity}$  along the DIC gradient  
436 for different alkalinity source materials (NaOH, slag, olivine) and compares this to  $\Delta\text{Alkalinity}$  along the same  
437 DIC gradient where only sand from a beach was present. The “sand only” data is identical in all four plots (orange  
438 lines in Fig. 4). It shows that  $\Delta\text{Alkalinity}$  is close to zero in the sand-only incubations when no DIC is added but  
439 increases exponentially with increasing DIC additions up to  $537 \mu\text{mol/kg}$ .



440 OAE via NaOH additions was set up in two different scenarios (Fig. 4A, B). In the first scenario, the carbonate  
441 system was equilibrated with atmospheric CO<sub>2</sub> after the NaOH deployment and before exposed to the sand (Fig.  
442 4A). This setup leads to a gradient in  $\Omega_{\text{Ar}}^{\text{Ar}}$  from 2.1 to 0.2 along the DIC gradient at the beginning of the 6.8 days  
443 incubations (highest  $\Omega_{\text{Ar}}^{\text{Ar}}$  at the lowest DIC addition). In the second scenario, the carbonate system was not  
444 equilibrated, thereby assuming that a NaOH-enriched patch of seawater would be exposed to sand sediments  
445 before it had taken up atmospheric CO<sub>2</sub> (Fig. 4B). Here, initial  $\Omega_{\text{Ar}}^{\text{Ar}}$  ranges from 7.1 to 2.3 along the DIC gradient.  
446 In the equilibrated scenario,  $\Delta\text{Alkalinity}$  was 482  $\mu\text{mol/kg}$  when no DIC was added and increased exponentially  
447 to 973  $\mu\text{mol/kg}$  at the highest DIC addition (Fig. 4A). In the unequilibrated scenario,  $\Delta\text{Alkalinity}$  was 344  $\mu\text{mol/kg}$   
448 when no DIC was added and increased to 474  $\mu\text{mol/kg}$  at the highest DIC addition. However, in contrast to the  
449 equilibrated treatment, the  $\Delta\text{Alkalinity}$  increase weakened along the DIC gradient and  $\Delta\text{Alkalinity}$  was lower than  
450 in the sand-only treatment when the DIC addition was  $>400 \mu\text{mol/kg}$  (Fig. 4B).  
451 In the slag treatment,  $\Delta\text{Alkalinity}$  was 521  $\mu\text{mol/kg}$  when no DIC was added.  $\Delta\text{Alkalinity}$  increased exponentially  
452 along the DIC gradient to 814  $\mu\text{mol/kg}$ . The increase of  $\Delta\text{Alkalinity}$  was less pronounced than in the sand-only  
453 treatment. Overall, the slag data showed more scatter relative to the other alkalinity source materials and sand-  
454 only treatments (Fig. 4C).  
455 In the olivine treatment,  $\Delta\text{Alkalinity}$  was 258  $\mu\text{mol/kg}$  when no DIC was added.  $\Delta\text{Alkalinity}$  increased  
456 exponentially with increasing DIC additions to 453  $\mu\text{mol/kg}$  although much less pronounced than in the sand-  
457 only treatment.  $\Delta\text{Alkalinity}$  was lower in the olivine than in the sand-only treatment when DIC additions were  
458  $>350 \mu\text{mol/kg}$  (Fig. 4C).  
459

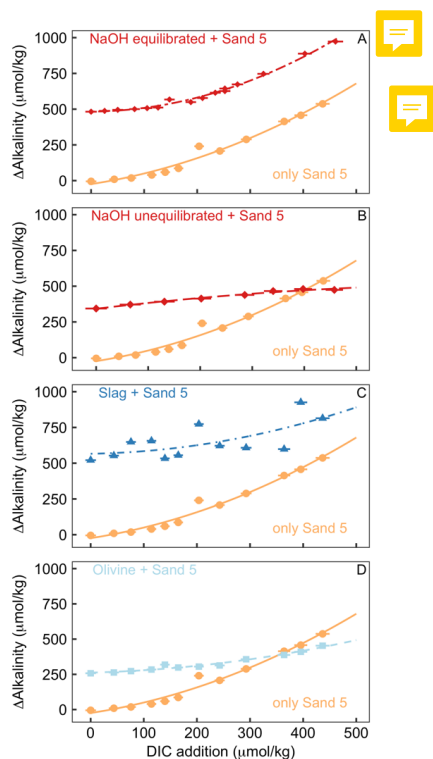

460



461 **Figure 4.** Results of Experiment 2. All panels show the change in alkalinity from the beginning to the end of the  
462 6.8 days experiment along a gradient of DIC added to the incubation bottles at the start of the incubations. The  
463 orange data displayed on all panels show  $\Delta$ Alkalinity for incubations where only sand was incubated. The other  
464 data on each panel show  $\Delta$ Alkalinity when sand was incubated with an external alkalinity source or addition  
465 scenario. (A) Sand and NaOH equilibrated with atmospheric  $\text{CO}_2$  upon addition; (B) Sand and NaOH which was  
466 not equilibrated with atmospheric  $\text{CO}_2$  upon addition; (C) Sand and slag; (D) Sand and olivine.

467

### 468 3.4. Experiment 3

469

470 Experiment 3 tested if there is a pH dependency of alkalinity release by olivine and slag (Fig. 5). The two-way  
471 ANOVA revealed a significant influence of  $\text{pH}_T$  on the release of alkalinity from olivine and slag (Fig. 4). Slag  
472 released  $707 \pm 61 \mu\text{mol/kg}$  alkalinity when incubated within a  $\text{pH}_T$  from initially 7.82 to 8.67 at the end of the 6.8  
473 days incubation. Within the lower  $\text{pH}_T$  range from 6.86-8.39, slag released  $805 \pm 86 \mu\text{mol/kg}$ . Olivine released  
474  $234 \pm 36 \mu\text{mol/kg}$  within the high  $\text{pH}_T$  range from 7.82-8.20 and  $298 \pm 8 \mu\text{mol/kg}$  in the low  $\text{pH}_T$  range from 6.86-  
475 7.63 (Fig. 5).

476

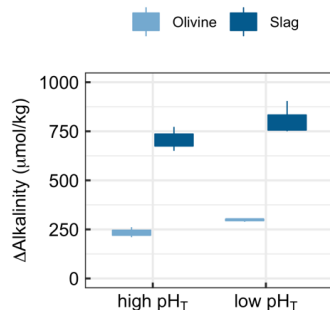

477

478 **Figure 5.** Results of Experiment 3. Changes in alkalinity from the beginning to the end of the 6.8 days experiment  
479 when olivine or slag were incubated (without sand) under high (initially 7.82) or low  $\text{pH}_T$  (initially 6.85).  
480  $\Delta$ Alkalinity was significantly higher under low  $\text{pH}_T$ .

481

## 482 4. Discussion

483

### 484 4.1. Carbonate-derived alkalinity is less efficient for CDR than non-carbonate-derived alkalinity

485

486 Section 2.6. introduced equations which show that alkalinity originating from carbonates ( $\text{Alk}_{\text{carbonate}}$ ) has  
487 considerably less capacity to absorb  $\text{CO}_2$  than alkalinity originating from non-carbonate sources such as olivine,  
488 slag, or NaOH ( $\text{Alk}_{\text{non-carbonate}}$ ). The large influence of this chemical constraint on OAE is exemplified in Fig. 6.  
489 Here, the uptake potential for atmospheric  $\text{CO}_2$  per mol alkalinity added to the ocean ( $\eta_{\text{CO}_2}$ ) is shown as a function  
490 of the carbonate contribution to the alkalinity source. When all  $\Delta$ Alkalinity delivered via OAE originates from  
491 non-carbonate sources (e.g., NaOH, slag, olivine), then  $\eta_{\text{CO}_2}$  equals 0.86 mol:mol.  $\eta_{\text{CO}_2}$  declines linearly with an



492 increasing contribution  $\text{Alk}_{\text{carbonate}}$  to  $\Delta\text{Alkalinity}$  to the lowest theoretical value for  $\eta_{\text{CO}_2}$  of 0.36 mol:mol, which  
493 is reached when OAE provides all alkalinity as  $\text{Alk}_{\text{carbonate}}$  (Fig. 6).  
494 The dependency of  $\eta_{\text{CO}_2}$  on the alkalinity source material (Fig. 6) has important implications for OAE methods  
495 that aim to utilise  $\text{CaCO}_3$  as alkalinity source (Harvey, 2008; Rau and Caldeira, 1999; Renforth et al., 2022;  
496 Wallmann et al., 2022). The molar efficiency for atmospheric  $\text{CO}_2$  sequestration of OAE is >50% lower when  
497 using carbonates (e.g.  $\text{CaCO}_3$ ). Or put differently, OAE approaches utilising  $\text{CaCO}_3$  as alkalinity source would  
498 have to increase alkalinity by more than twice as much to generate similar CDR compared to methods that use  
499 non-carbonates (e.g. NaOH, slag, or olivine). Importantly, while this disadvantage of carbonates sources of  
500 alkalinity appears to be substantial, it is not the only important factor determining the potential of such OAE  
501 approaches. It is possible that the use of carbonates still holds higher potential, for example because limestone is  
502 relatively abundant (Caserini et al., 2022), can dissolve (Renfort et al., 2022), or because it contains less  
503 components potentially affecting marine organisms (Bach et al., 2019). Nevertheless, the dependency of  $\eta_{\text{CO}_2}$   
504 the alkalinity source (Fig. 6) needs to be considered when assessing the efficiency of different OAE methods, as  
505 will become apparent in section 4.2.  
506

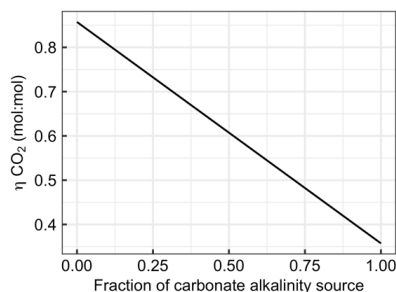

507  
508 **Figure 6.** Changes in  $\eta_{\text{CO}_2}$  with the fraction alkalinity that originates from carbonates (e.g.  $\text{CaCO}_3$  dissolution).  
509 The x-axis ranges from 0, which means all alkalinity originates from non-carbonate sources such as NaOH, slag,  
510 or olivine to 1, which means all alkalinity originates from carbonate sources such as  $\text{CaCO}_3$  or  $\text{MgCO}_3$ .

#### 511 512 4.2. The additionality problem of OAE

513  
514 The experiments considered here investigate coastal applications of OAE, for example when ground minerals or  
515 NaOH are exposed to beaches or sandy sediments. In the experiments, the treatments where only sand was  
516 incubated constitute the baseline system while incubations of sand and an alkalinity source constitute the OAE  
517 deployments. Both the baseline system and the OAE deployment were run in parallel under identical conditions.  
518 To assess the net  $\text{CO}_2$  sequestration (additionality) of OAE,  $\text{CO}_2$  sequestration achieved through an OAE  
519 deployment must be compared to the baseline state where no such deployment occurred (see eq. 8). As such,  
520 additionality can be affected through processes that affect the OAE deployment directly (section 4.2.1.), or  
521 through when the OAE deployment alters the baseline state of the system (section 4.2.2.).

##### 522 523 4.2.1. Change of additionality through interaction of alkalinity sources with sand

524

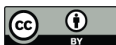

525 The  $\Delta$ Alkalinities determined in Experiment 1 were lower in NaOH and slag incubations with sand than in  
526 incubations without sand. The reduction in the presence of sand was most likely due secondary precipitation of  
527 carbonates, which is promoted when  $\Omega_{\text{CaCO}_3}$  is elevated and particle abundance is high (Fuhr et al., 2022; Moras  
528 et al., 2022; Zhong and Mucci, 1989). In the case of slag, very small amounts of particles were also present in the  
529 incubation without sand but apparently not enough to catalyse a similar degree of secondary precipitation as in  
530 the case when 10 g of sand are present.

531 In contrast to the NaOH and slag incubations, the olivine incubations generated more  $\Delta$ Alkalinity when sand was  
532 present, even though the enhancement was small and only in one case statistically significant (i.e. No Sand vs  
533 Sand 4; Fig. 3A). This contrasting observation can be explained as follows. First,  $\Delta$ Alkalinity was generally lower  
534 in the olivine incubations than in the NaOH and slag incubations when no sand was present ( $266 \pm 14.8 \mu\text{mol/kg}$   
535 for olivine vs.  $>420 \mu\text{mol/kg}$  for NaOH and slag). Moras et al. (2022) have shown that the onset of secondary  
536 precipitation depends on  $\Delta$ Alkalinity and they observed no secondary precipitation over a 40 days experimental  
537 incubation when  $\Delta$ Alkalinity was  $\sim 250 \mu\text{mol/kg}$ . This suggest that the  $266 \pm 14.8 \mu\text{mol/kg}$   $\Delta$ Alkalinity generated  
538 by olivine did not elevate  $\Omega_{\text{Ara}}$  to high enough levels to induce noticeable secondary precipitation within 6.8 days.  
539 However, the absence of such secondary precipitation cannot explain why  $\Delta$ Alkalinity increased in the presence  
540 of sand. It is possible that the sand itself released alkalinity via carbonate dissolution as a very small increase in  
541  $\Delta$ Alkalinity was also observed in the sand-only incubations (e.g.  $17.4 \pm 2.6 \mu\text{mol/kg}$  in Sand 4; Fig. 3A). However,  
542  $\Omega_{\text{Ara}}$  was higher in the olivine incubations as in the sand-only treatment so that a release of carbonate alkalinity  
543 seems unlikely. It is also unlikely that the pH differences between olivine-only and olivine+sand incubations  
544 drove this trend. While Experiment 3 underscores that lower pH promotes the release of alkalinity from olivine  
545 (Fig. 5), pHT was higher in the olivine+sand treatment where significantly more alkalinity was released (see Sand  
546 4 in Fig. 4A). What appears as a plausible explanation is that the sand caused physical destruction of coatings that  
547 develop on the olivine particles during dissolution and are known to reduce dissolution rates (Oelkers et al., 2018).  
548 Indeed, the dissolution-enhancing role physical abrasion has been hypothesised to increase OAE efficiency when  
549 using olivine, although the dataset underpinning this hypothesis has not made it through peer-review (Schuiling  
550 and de Boer, 2011).

551  $\eta_{\text{CO}_2}$  is reduced when the presence of sand catalyses secondary precipitation (Fig. 4C). As a consequence, the  
552 amount of DIC that can be sequestered via OAE declines. Among other factors, the degree of alkalinity loss due  
553 to secondary precipitation depends on the duration carbonate supersaturated water is exposed to the sand. The  
554 experiments presented here lasted for 6.8 days and it is likely that secondary precipitation would have proceeded  
555 (and  $\eta_{\text{CO}_2}$  further declined) if the experiments had lasted for longer. Indeed, Moras et al. (2022) observed that  
556 secondary precipitation catalysed by particles only slowed down once  $\Omega_{\text{Ara}}$  reached  $\sim 2$ . In the experiments  
557 presented here,  $\Omega_{\text{Ara}}$  was generally  $>5$  at the end of the study. Carbonate chemistry calculations with seacarb (data  
558 not shown) suggest that a decline until  $\Omega_{\text{Ara}}$  reaches 2 via carbonate precipitation (i.e. alkalinity and DIC decline  
559 in a 2:1 molar ratio) would have reduced alkalinity by  $\sim 560 \mu\text{mol/kg}$  for the NaOH and  $840 \mu\text{mol/kg}$  for the slag  
560 incubations, respectively. In both cases the alkalinity after the OAE perturbation would be lower than before but  
561 atmospheric  $\text{CO}_2$  uptake would still occur ( $\eta_{\text{CO}_2} = 0.39$  for NaOH and 0.37 for slag) because the  $\text{pCO}_2$  is still  
562 slightly lower than before the perturbation (Moras et al., 2022).

563  
564

#### 4.2.2. Reduction of additionality through modification of baseline alkalinity formation





565

566 One interesting observation was made during a sand-only incubation of Experiment 1 (i.e. “No\_alk in Fig. 3).  
567 For Sand 2,  $\Delta$ Alkalinity was about 85  $\mu\text{mol/kg}$  higher in one replicate bottle than in the other two. This difference  
568 was due to a small arthropod (likely a sand flea) that was unintentionally added to the incubation bottle with the  
569 high  $\Delta$ Alkalinity. The arthropod was still alive at the end of the 6.8 incubation period. During those 6.8 days, the  
570 organism respired, thereby reducing  $\Omega_{\text{Ara}}$ , and causing alkalinity release from the sand via  $\text{CaCO}_3$  dissolution.  
571 This observation pointed out that the baseline system can already release substantial amounts of alkalinity even  
572 before OAE is implemented given sufficient respiration. Indeed, the in-situ observations at Clifton South suggest  
573 that alkalinity release occurs in the baseline system used here (section 3.1). Furthermore, there is widespread  
574 evidence from the literature that beaches release alkalinity via  $\text{CaCO}_3$  dissolution (Liu et al., 2021; Perkins et al.,  
575 2022; Reckhardt et al., 2015). These insights collectively inspired Experiment 2, where a DIC gradient (high to  
576 low  $\Omega_{\text{Ara}}$ ) was set up to test if natural alkalinity release via  $\text{CaCO}_3$  dissolution would be influenced by  
577 anthropogenic alkalinity release via OAE.

578 Experiment 2 demonstrated that the release of natural alkalinity can be disturbed by the addition of anthropogenic  
579 alkalinity sources (Fig. 7). Fig. 7A illustrates the additionality of alkalinity release, calculated by subtracting  
580  $\Delta$ Alkalinity from sand-only incubations (represented by the orange lines in Fig. 4 panels A-D) from  $\Delta$ Alkalinity  
581 in sand+alkalinity incubations (represented by the red and blue lines). Fig. 7A reveals that the additionality of  
582  $\Delta$ Alkalinity declines with increasing amounts of added DIC. The reason for this trend is that the alkalinity sources  
583 added to the incubation bottles buffered the DIC-induced pH decline. This buffering elevated  $\Omega_{\text{Ara}}$  during the  
584 incubations, resulting in a reduced release of natural alkalinity through  $\text{CaCO}_3$  dissolution. Or in simpler terms,  
585 by adding a new buffer system via OAE (NaOH, slag, or olivine), a natural buffer system ( $\text{CaCO}_3$  dissolution) is  
586 partially replaced. In cases where olivine or non-equilibrated NaOH was tested, the additionality of  $\Delta$ Alkalinity  
587 became even negative when DIC additions were  $>350$  and  $>400$   $\mu\text{mol/kg}$ , respectively (Fig. 7A).

588 Alkalinity release is generally seen as a good indicator for the amount of  $\text{CO}_2$  that can be removed per mole  
589 alkalinity enhancement ( $\eta_{\text{CO}_2}$ ). However, as discussed in section 4.1.,  $\eta_{\text{CO}_2}$  also critically depends on whether the  
590 released alkalinity is  $\text{Alk}_{\text{carbonate}}$  or  $\text{Alk}_{\text{non-carbonate}}$ . In Experiment 2,  $\eta_{\text{CO}_2}$  varies greatly depending on the alkalinity  
591 source and the amount of DIC added to the incubation (Fig. 7B).  $\eta_{\text{CO}_2}$  is low for sand-only incubations because  
592 basically all  $\Delta$ Alkalinity is  $\text{Alk}_{\text{carbonate}}$ , whereas it is substantially higher in treatments with an anthropogenic  
593  $\text{Alk}_{\text{non-carbonate}}$  source. For olivine,  $\eta_{\text{CO}_2}$  was around 0.7 mol:mol up until the highest DIC additions where  $\eta_{\text{CO}_2}$   
594 declines slightly. This is lower than for slag, where  $\eta_{\text{CO}_2}$  remains close to the theoretical maximum of 0.86  
595 mol:mol. The difference between slag and olivine could be due to faster dissolution of slag, which elevates  $\Omega_{\text{Ara}}$   
596 before substantial  $\text{CaCO}_3$  dissolution had occurred. In contrast, olivine dissolves more slowly (Fuhr et al., 2022;  
597 Montserrat et al., 2017), so that some  $\text{CaCO}_3$  dissolution may have occurred before olivine dissolution elevated  
598  $\Omega_{\text{Ara}}$  enough to limit further  $\text{CaCO}_3$  dissolution. (Please note, however, that this explanation does not explain why  
599  $\eta_{\text{CO}_2}$  is also lower than in slag incubations at low DIC additions, where  $\Omega_{\text{Ara}}$  was low enough to limit  $\text{CaCO}_3$   
600 dissolution from the start). The reason for the decreasing  $\eta_{\text{CO}_2}$  in the equilibrated NaOH scenario (Fig. 7B) is an  
601 increasing contribution of  $\text{Alk}_{\text{carbonate}}$  to  $\Delta$ Alkalinity. It is important to note that for the same added DIC,  $\Omega_{\text{Ara}}$  is  
602 much lower in the equilibrated NaOH scenario than in unequilibrated NaOH scenario (e.g. 0.28 vs. 2.9 at  $\sim 400$   
603  $\mu\text{mol/kg}$  added DIC for the equilibrated and unequilibrated NaOH scenarios, respectively). This lower  $\Omega_{\text{Ara}}$  in the  
604 equilibrated scenario is due to atmospheric  $\text{CO}_2$  in-gassing, which has already reduced  $\Omega_{\text{Ara}}$  in the equilibrated



605 scenario before this seawater starts interacting with beach sediments rich in respiratory  $\text{CO}_2$ . As such, this OAE  
606 scenario causes less reduction of natural alkalinity release from sediments via  $\text{CaCO}_3$  dissolution.  
607 Measurements and estimates of  $\Delta\text{Alkalinity}$  and  $\eta_{\text{CO}_2}$  enabled calculation of how much DIC could be maximally  
608 stored by the generated alkalinity (i.e.,  $\text{DIC}_{\text{OAE}}$  shown in Fig. 7C).  $\text{DIC}_{\text{OAE}}$  increases with higher DIC additions  
609 due to the release of alkalinity via  $\text{CaCO}_3$  dissolution. However, the increase is less pronounced as observed for  
610  $\Delta\text{Alkalinity}$  (Fig. 7A) because  $\text{Alk}_{\text{carbonate}}$  from  $\text{CaCO}_3$  dissolution is less efficient in sequestering environmental  
611  $\text{CO}_2$  than  $\text{Alk}_{\text{non-carbonate}}$  from NaOH, slag, or olivine (section 4.1).  
612 To calculate the additionality of  $\text{DIC}_{\text{OAE}}$ , I subtracted  $\text{DIC}_{\text{OAE}}$  of the sand-only incubations (baseline) of  $\text{DIC}_{\text{OAE}}$   
613 of the OAE scenarios (Fig. 7D). The additionality of  $\text{DIC}_{\text{OAE}}$  is arguably the most important parameter to assess  
614 whether an OAE deployment has led to the net sequestration of  $\text{CO}_2$ . In the case of the equilibrated NaOH and  
615 slag scenarios, the additionality of  $\text{DIC}_{\text{OAE}}$  was constant over the applied gradient, suggesting that the release of  
616  $\text{Alk}_{\text{carbonate}}$  via  $\text{CaCO}_3$  dissolution led to similar  $\text{DIC}_{\text{OAE}}$  potential in the sand-only scenario and these two OAE  
617 scenarios. In contrast, the additionality of  $\text{DIC}_{\text{OAE}}$  declined in the olivine scenario because there was relatively  
618 more  $\text{Alk}_{\text{carbonate}}$  release in the sand only scenario than in the olivine scenario (Fig. 7D). Importantly, however, the  
619 additionality of  $\text{DIC}_{\text{OAE}}$  remains positive up until the highest DIC addition, which is in stark contrast to the  
620 additionality of  $\Delta\text{Alkalinity}$  (compare Fig 7A and D). This means that the addition of olivine maintained a positive  
621  $\text{CO}_2$  sequestration potential even though less alkalinity was generated in the olivine treatment than in the sand-  
622 only treatment (Fig. 7C). The reason for this counterintuitive observation is simply that the  $\text{Alk}_{\text{non-carbonate}}$  released  
623 by olivine has more potential to sequester  $\text{CO}_2$  than the  $\text{Alk}_{\text{carbonate}}$  released via  $\text{CaCO}_3$  dissolution.  
624

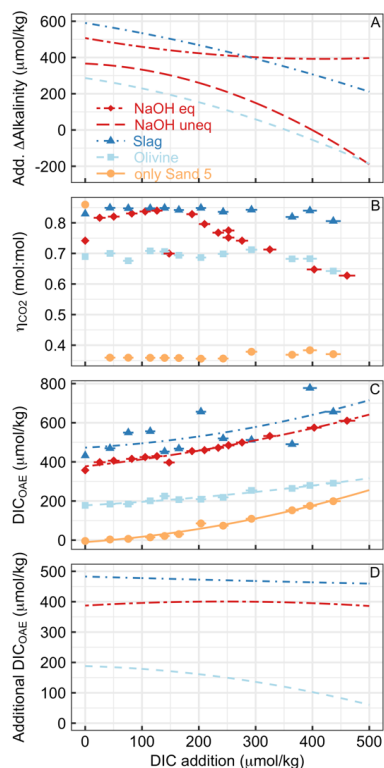

625

626 **Figure 7.** Various measures of OAE efficiency under increasing additions of DIC (DIC could for example be CO<sub>2</sub>  
627 from the respiration of organic material in sediments). (A) The additionality of ΔAlkalinity. (B)  $\eta_{\text{CO}_2}$  at the end  
628 of the experiment. (C) DIC<sub>OAE</sub>, i.e., how much seawater CO<sub>2</sub> could have potentially been absorbed with the  
629 amount of ΔAlkalinity provided by the various alkalinity sources. (D) The additionality of DIC<sub>OAE</sub>. Please note  
630 that panels (B-D) only show data for the equilibrated NaOH scenario. I omitted the unequilibrated scenario for  
631 logical reasons, i.e., because the core assumption in this scenario (no CO<sub>2</sub> equilibration with the atmosphere after  
632 OAE) is at odds with the necessary assumption of CO<sub>2</sub> equilibration to calculate  $\eta_{\text{CO}_2}$  (see eq. 10).

633

#### 634 4.2.3. Relevance of the additionality problem of OAE and possible solutions

635

636 Modifications of additionality can occur when OAE triggers subsequent alkalinity loss through biotic and abiotic  
637 carbonate precipitation (section 4.2.1.). This feedback has been widely discussed and is already a predominant  
638 topic in OAE research (Bach et al., 2019; Fuhr et al., 2022; Hartmann et al., 2013, 2023; Moras et al., 2022). Not  
639 yet discussed is the modification of additionality that may occur when anthropogenic alkalinity sources (via OAE)  
640 modify the release of natural alkalinity (section 4.2.2.). Thus, I will focus on the relevance of this second pathway  
641 of additionality modification in the following.

642 The experiments conducted here tested mineral dissolution feedbacks with beach sand and in a setting that  
643 assumes constant mixing, comparable to a high energy wave impact zone. This setting was chosen based on the  
644 widely discussed OAE implementation strategy adding olivine powder to beaches. The results suggest that the

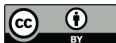

645 “additionality problem” needs to be considered for this specific OAE approach. However, the wave impact zone  
646 comprises a tiny fraction of the coastal ocean and the question is to what extent the additionality problem also  
647 applies to the vast shelf, bank, embayment and reef areas where OAE could also be implemented (Feng et al.,  
648 2017; Meysman and Montserrat, 2017; Mongin et al., 2021). The coastal ocean is a net sink of  $\sim 36$  Tmol/year  
649 alkalinity via  $\text{CaCO}_3$  burial (Middelburg et al., 2020), but considerable amounts of alkalinity are also generated  
650 in the various coastal sediments via  $\text{CaCO}_3$  dissolution (one estimate suggests  $\sim 13$  Tmol/year; (Krumins et al.,  
651 2013)). The dissolution depends on the solubility of  $\text{CaCO}_3$  present in the sediments and pore water  $\Omega$   
652 (Middelburg et al., 2020). Conditions for dissolution are generally favourable in coastal ocean sediments because  
653 soluble forms of  $\text{CaCO}_3$  occur more frequently and relatively high supply of organic matter lowers  $\Omega_{\text{CaCO}_3}$   
654 (Krumins et al., 2013; Lunstrum and Berelson, 2022; Morse et al., 1985). Thus, the introduction of an  
655 anthropogenic buffer via OAE (which increases  $\Omega_{\text{CaCO}_3}$ ) is likely to cause a reduction of alkalinity release from  
656 the seafloor.

657 Indeed, more soluble forms of  $\text{CaCO}_3$  were shown to protect less soluble forms of  $\text{CaCO}_3$  from  
658 dissolution at the seafloor (Sulpis et al., 2022). Furthermore, an experiment exposed a coral reef to moderate levels  
659 of increased alkalinity ( $\Delta\text{Alkalinity} = \sim 50 \mu\text{mol/kg}$ ) and found a net increase of reef calcification, with some  
660 evidence suggesting that the measured effect was due to reduced reef dissolution (Albright et al., 2016).  
661 Anthropogenic alkalinity sources (e.g. NaOH, slag, olivine) introduced via OAE can be considered to have a  
662 similar effect and reduce natural alkalinity release via  $\text{CaCO}_3$  dissolution. It is worth noting that the negative effect  
663 of anthropogenic alkalinity on natural alkalinity release may also occur in the open surface ocean. Here, part of  
664 the alkalinity bound in particulate form via biotic calcification re-dissolves, for example in corrosive  
665 microenvironments such as zooplankton or marine snow (Milliman et al., 1999; Subhas et al., 2022; Sulpis et al.,  
666 2021). If anthropogenic alkalinity introduced via OAE reduces this natural dissolution of  $\text{CaCO}_3$  in the surface  
667 ocean, then less alkalinity would remain in the surface ocean and the additionality of OAE would be reduced  
668 (Bach et al., 2019). Thus, the “additionality problem” of OAE could be widespread and not restricted to the  
669 specific environment studied experimentally in this paper.

670 To manage the additionality problem, it is important to monitor the natural alkalinity release in a designated OAE  
671 deployment site before OAE is implemented. Natural alkalinity release occurs in all coastal habitats (Aller, 1982;  
672 Krumins et al., 2013; Liu et al., 2021; Perkins et al., 2022) and recent evidence suggests that even small  $\text{CaCO}_3$   
673 content in sediments is sufficient to yield high alkalinity release rates (Lunstrum and Berelson, 2022). As such,  
674 dissolution is not restricted to  $\text{CaCO}_3$  rich sediments and avoiding these may therefore not mitigate the  
675 additionality problem. More crucial than the  $\text{CaCO}_3$  content appears to be the supply of organic matter to the  
676 seafloor, which enhances alkalinity release through the supply of respiratory  $\text{CO}_2$  (Aller, 1982; Krumins et al.,  
677 2013; Liu et al., 2021; Lunstrum and Berelson, 2022; Perkins et al., 2022). Therefore, it may be useful to avoid  
678 OAE near sediments exposed to high organic matter load to reduce the interference of anthropogenic alkalinity  
679 with natural alkalinity release.

680 Another mitigation pathway for the additionality problem is dilution. When anthropogenic alkalinity is diluted  
681 quickly then there is less chance for the new buffer system to generate oversaturated  $\Omega$  in seawater, sediment pore  
682 waters, or other microenvironments. The experiments presented here do not allow for such dilution as they are  
683 performed in enclosed volumes. They can therefore be considered a more extreme case, which do not correctly  
684 represent the vastness of the ocean and its volume. Indeed, previous experiments investigating the risk of alkalinity

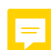



685 loss after OAE due to secondary precipitation found that dilution effectively mitigates the secondary precipitation  
686 problem (Moras et al., 2022). It is very likely that dilution is similarly effective to mitigate the additionality  
687 problem.

688 Finally, the data presented here clearly shows that the additionality problem scales with the degree of  $\text{CaCO}_3$   
689 oversaturation introduced through the anthropogenic alkalinity source. This is most obvious when comparing the  
690 equilibrated with the unequilibrated NaOH OAE scenario. The increase of  $\Omega_{\text{CaCO}_3}$  is much more pronounced in  
691 the unequilibrated scenario because atmospheric  $\text{CO}_2$  has not yet entered the seawater and brought down  $\Omega_{\text{CaCO}_3}$   
692 to levels it was before the OAE perturbation. As such, the additionality problem will be much more pronounced  
693 when an alkalinity source interacts with naturally alkalinity releasing sediments before the OAE-perturbed  
694 seawater has been equilibrated with atmospheric  $\text{CO}_2$ . Nevertheless, a close look at Fig. 3A (equilibrated NaOH)  
695 shows that even the relatively small increase of  $\Omega_{\text{CaCO}_3}$  that coincides with OAE fully equilibrated with  
696 atmospheric  $\text{CO}_2$ , can reduce natural alkalinity release. Thus, atmospheric  $\text{CO}_2$  equilibration following OAE  
697 mitigates the additionality problem but cannot fully avoid it.

698

## 699 5. Conclusion and outlook

700

701 The additionality problem described herein could influence the effectiveness of OAE. It suggests that interference  
702 of anthropogenic alkalinity with the natural alkalinity cycle must be assessed as a factor that can modify the OAE  
703 efficiency. The arguments provided in the discussion suggest that the additionality problem is potentially  
704 widespread, even though the dataset presented here only considers OAE near or on wave-exposed beaches. Future  
705 research should aim to confirm or dismiss these arguments and to better understand the extent of the problem.

706 The additionality problem adds a layer of complexity to monitoring, reporting, and verification of  $\text{CO}_2$  removal  
707 with OAE. Strictly speaking, it is not sufficient to monitor the generation (e.g., via NaOH, slag, or olivine  
708 dissolution) and potential loss (e.g., via biotic and abiotic precipitation) of anthropogenic alkalinity after its  
709 generation. It also needs to be assessed to what extent anthropogenic alkalinity alters the baseline removal or  
710 delivery of natural alkalinity. It will be crucial to understand whether the anthropogenic acceleration of the  
711 alkalinity cycle in the oceans via OAE could slow down the natural alkalinity cycle.

712

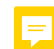

## 713 Competing interests

714 The author declares no competing interests.

715

## 716 Acknowledgements

717 I thank Jiaying Guo and Bec Lenc for providing particle size spectra, the Mortlake Council for providing olivine  
718 samples, Bradley Mansell from Liberty Primary Steel for providing steel slag aggregates, and the Central Science  
719 Laboratory at the University of Tasmania for particulate carbon analyses. This research was funded through a  
720 Future Fellowship Award by the Australian Research Council (FT200100846) and by the Carbon-to-Sea  
721 Initiative, a non-profit dedicated to evaluate Ocean Alkalinity Enhancement.

722

## 723 Data availability statement



724 All data and evaluation scripts (for R) generated herein are available for download at zenodo.org under the  
725 doi:10.5281/zenodo.8191516.

726

727

## 728 **References**

- 729 Albright, R., Caldeira, L., Hoffelt, J., Kwiatkowski, L., Maclaren, J. K., Mason, B. M., Nebuchina, Y.,  
730 Ninokawa, A., Pongratz, J., Ricke, K. L., Rivlin, T., Schneider, K., Sesboté, M., Shamberger, K., Silverman, J.,  
731 Wolfe, K., Zhu, K. and Caldeira, K.: Reversal of ocean acidification enhances net coral reef calcification,  
732 *Nature*, 531(7594), 362–365, doi:10.1038/nature17155, 2016.
- 733 Aller, R. C.: Carbonate Dissolution in Nearshore Terrigenous Muds: The Role of Physical and Biological  
734 Reworking, *J. Geol.*, 90(1), 79–95, doi:10.1086/628652, 1982.
- 735 Bach, L. T., Gill, S. J., Rickaby, R. E. M., Gore, S. and Renforth, P.: CO<sub>2</sub> Removal With Enhanced Weathering  
736 and Ocean Alkalinity Enhancement: Potential Risks and Co-benefits for Marine Pelagic Ecosystems, *Front.*  
737 *Clim.*, 1(October), 1–21, doi:10.3389/fclim.2019.00007, 2019.
- 738 Caserini, S., Storni, N. and Grosso, M.: The Availability of Limestone and Other Raw Materials for Ocean  
739 Alkalinity Enhancement, *Global Biogeochem. Cycles*, 36(5), doi:10.1029/2021GB007246, 2022.
- 740 Dickson, A. G., Afghan, J. D. and Anderson, G. C.: Reference materials for oceanic CO<sub>2</sub> analysis: a method for  
741 the certification of total alkalinity, *Mar. Chem.*, 80(2–3), 185–197, doi:10.1016/S0304-4203(02)00133-0, 2003.
- 742 Dickson, A. G., Sabine, C. L. and Christian, J. R.: Guide to Best Practices for Ocean CO<sub>2</sub> Measurements,  
743 *PICES Spec.*, PICES, Sidney., 2007.
- 744 Eisaman, M. D., Rivest, J. L. B., Karnitz, S. D., Lannoy, C. De, Jose, A., Devaul, R. W. and Hannun, K.:  
745 *International Journal of Greenhouse Gas Control Indirect ocean capture of atmospheric CO<sub>2</sub>: Part II .*  
746 *Understanding the cost of negative emissions*, *Int. J. Greenh. Gas Control*, 70(May 2017), 254–261,  
747 doi:10.1016/j.ijggc.2018.02.020, 2018.
- 748 Eisaman, M. D., Geilert, S., Renforth, P., Bastianini, L., Campbell, J., Dale, A. W., Foteinis, S., Grasse, P.,  
749 Hawrot, O., Löscher, C. R., Rau, G. H. and Rønning, J.: Chapter 3: Assessing the technical aspects of OAE  
750 approaches, in *Guide for best practices in Ocean Alkalinity Enhancement.*, 2023.
- 751 Fakhraee, M., Planavsky, N. J. and Reinhard, C. T.: Ocean alkalinity enhancement through restoration of blue  
752 carbon ecosystems, *Nat. Sustain.*, doi:10.1038/s41893-023-01128-2, 2023.
- 753 Feng, E. Y., Koeve, W., Keller, D. P. and Oschlies, A.: Model-Based Assessment of the CO<sub>2</sub> Sequestration  
754 Potential of Coastal Ocean Alkalinization, *Earth's Futur.*, 5, 1252–1266, doi:10.1002/ef2.273, 2017.
- 755 Ferderer, A., Chase, Z., Kennedy, F., Schulz, K. G. and Bach, L. T.: Assessing the influence of ocean alkalinity  
756 enhancement on a coastal phytoplankton community, *Biogeosciences*, 19(23), 5375–5399, doi:10.5194/bg-19-  
757 5375-2022, 2022.
- 758 Fuhr, M., Geilert, S., Schmidt, M., Liebetrau, V., Vogt, C., Ledwig, B. and Wallmann, K.: Kinetics of Olivine  
759 Weathering in Seawater: An Experimental Study, *Front. Clim.*, 4(March), 1–20,  
760 doi:10.3389/fclim.2022.831587, 2022.
- 761 Gattuso, J.-P., Epitalon, J.-M., Lavigne, H. and Orr, J.: Seacarb: seawater carbonate chemistry with R. R  
762 package version 3.0, [online] Available from: <http://cran.r-project.org/package=seacarb>, 2021.
- 763 Hansen, H. P. and Koroleff, F.: Determination of nutrients, in *Methods of Seawater Analysis*, edited by K.



- 764 Grasshoff, K. Kremling, and M. Ehrhardt, pp. 159–226, Wiley-VCH, Weinheim., 1999.
- 765 Hartmann, J., West, a J., Renforth, P., Köhler, P., Rocha, C. L. D. La, Wolf-gladrow, D. a, Dürr, H. H. and  
766 Scheffran, J.: Enhanced chemical weathering as a geoengineering strategy to reduce atmospheric carbon  
767 dioxide, supply nutrients, and mitigate ocean acidification, *Rev. Geophys.*, 51(2012), 113–149,  
768 doi:10.1002/rog.20004.1.Institute, 2013.
- 769 Hartmann, J., Suitner, N., Lim, C., Schneider, J., Marin-Samper, L., Aristegui, J., Renforth, P., Taucher, J. and  
770 Riebesell, U.: Stability of alkalinity in ocean alkalinity enhancement (OAE) approaches - consequences for  
771 durability of CO<sub>2</sub> storage, *Biogeosciences*, 20(4), 781–802, doi:10.5194/bg-20-781-2023, 2023.
- 772 Harvey, L. D. D.: Mitigating the atmospheric CO<sub>2</sub> increase and ocean acidification by adding limestone powder  
773 to upwelling regions, *J. Geophys. Res. Ocean.*, 113(4), 1–21, doi:10.1029/2007JC004373, 2008.
- 774 He, J. and Tyka, M. D.: Limits and CO<sub>2</sub> equilibration of near-coast alkalinity enhancement, *Biogeosciences*, 20,  
775 27–43, doi:10.5194/bg-20-27-2023, 2023.
- 776 Humphreys, M. P., Gregor, L., Pierrot, D., van Heuven, S. M. A. C., Lewis, E. R. and Wallace, D. W. R.:  
777 PyCO<sub>2</sub>SYs: marine carbonate system calculations in Python, , doi:10.5281/zenodo.3744275, 2020.
- 778 Krumins, V., Gehlen, M., Arndt, S., Van Cappellen, P. and Regnier, P.: Dissolved inorganic carbon and  
779 alkalinity fluxes from coastal marine sediments: Model estimates for different shelf environments and  
780 sensitivity to global change, *Biogeosciences*, 10(1), 371–398, doi:10.5194/bg-10-371-2013, 2013.
- 781 de Lannoy, C. F., Eisaman, M. D., Jose, A., Karnitz, S. D., DeVaul, R. W., Hannun, K. and Rivest, J. L. B.:  
782 Indirect ocean capture of atmospheric CO<sub>2</sub>: Part I. Prototype of a negative emissions technology, *Int. J. Greenh.*  
783 *Gas Control*, 70(May 2017), 243–253, doi:10.1016/j.ijggc.2017.10.007, 2018.
- 784 Lezaun, J.: Hugging the Shore: Tackling Marine Carbon Dioxide Removal as a Local Governance Problem,  
785 *Front. Clim.*, 3(August), 1–6, doi:10.3389/fclim.2021.684063, 2021.
- 786 Liu, Y., Jiao, J. J., Liang, W., Santos, I. R., Kuang, X. and Robinson, C. E.: Inorganic carbon and alkalinity  
787 biogeochemistry and fluxes in an intertidal beach aquifer: Implications for ocean acidification, *J. Hydrol.*,  
788 595(January), 126036, doi:10.1016/j.jhydrol.2021.126036, 2021.
- 789 Lueker, T. J., Dickson, A. G. and Keeling, C. D.: Ocean pCO<sub>2</sub> calculated from dissolved inorganic carbon,  
790 alkalinity, and equations for K<sub>1</sub> and K<sub>2</sub>: Validation based on laboratory measurements of CO<sub>2</sub> in gas and  
791 seawater at equilibrium, *Mar. Chem.*, 70, 105–119, doi:10.1016/S0304-4203(00)00022-0, 2000.
- 792 Lunstrum, A. and Berelson, W.: CaCO<sub>3</sub> dissolution in carbonate-poor shelf sands increases with ocean  
793 acidification and porewater residence time, *Geochim. Cosmochim. Acta*, 329, 168–184,  
794 doi:10.1016/j.gca.2022.04.031, 2022.
- 795 Meysman, F. J. R. and Montserrat, F.: Negative CO<sub>2</sub> emissions via enhanced silicate weathering in coastal  
796 environments, *Biol. Lett.*, 13(4), 20160905, doi:10.1098/rsbl.2016.0905, 2017.
- 797 Middelburg, J. J., Soetaert, K. and Hagens, M.: Ocean Alkalinity, Buffering and Biogeochemical Processes,  
798 *Rev. Geophys.*, 58(3), doi:10.1029/2019RG000681, 2020.
- 799 Milliman, J. D., Troy, P. J., Balch, W. M., Adams, a. K., Li, Y.-H. and Mackenzie, F. T.: Biologically mediated  
800 dissolution of calcium carbonate above the chemical lysocline?, *Deep Sea Res. Part I Oceanogr. Res. Pap.*,  
801 46(10), 1653–1669, doi:10.1016/S0967-0637(99)00034-5, 1999.
- 802 Mongin, M., Baird, M. E., Lenton, A., Neill, C. and Akl, J.: Reversing ocean acidification along the Great  
803 Barrier Reef using alkalinity injection, *Environ. Res. Lett.*, 16(6), doi:10.1088/1748-9326/ac002d, 2021.



- 804 Montserrat, F., Renforth, P., Hartmann, J., Leermakers, M., Knops, P. and Meysman, F. J. R.: Olivine  
805 Dissolution in Seawater: Implications for CO<sub>2</sub> Sequestration through Enhanced Weathering in Coastal  
806 Environments, *Environ. Sci. Technol.*, 51(7), 3960–3972, doi:10.1021/acs.est.6b05942, 2017.
- 807 Moras, C. A., Bach, L. T., Cyronak, T., Joannes-Boyau, R. and Schulz, K. G.: Ocean alkalinity enhancement -  
808 avoiding runaway CaCO<sub>3</sub> precipitation during quick and hydrated lime dissolution, *Biogeosciences*, 19(15),  
809 3537–3557, doi:10.5194/bg-19-3537-2022, 2022.
- 810 Morse, J. W., Zullig, J. J., Bernstein, L. D., Millero, F. J., Milne, P., Mucci, A. and Choppin, G. R.: Chemistry  
811 of calcium carbonate-rich shallow water sediments in the Bahamas., *Am. J. Sci.*, 285(2), 147–185,  
812 doi:10.2475/ajs.285.2.147, 1985.
- 813 Morse, J. W., Gledhill, D. K. and Millero, F. J.: CaCO<sub>3</sub> precipitation kinetics in waters from the great Bahama  
814 bank: Implications for the relationship between bank hydrochemistry and whittings, *Geochim. Cosmochim.*  
815 *Acta*, 67(15), 2819–2826, doi:10.1016/S0016-7037(03)00103-0, 2003.
- 816 Mucci, A.: The solubility of calcite and aragonite in seawater at various salinities, temperatures, and one  
817 atmosphere total pressure, *Am. J. Sci.*, 283(7), 780–799, 1983.
- 818 Nemet, G. F., Callaghan, M. W., Creutzig, F., Fuss, S., Hartmann, J., Hilaire, J., Lamb, W. F., Minx, J. C.,  
819 Rogers, S. and Smith, P.: Negative emissions — Part 3: Innovation and upscaling, *Environ. Res. Lett.*, 13,  
820 06300, 2018.
- 821 Oelkers, E. H., Declercq, J., Saldi, G. D., Gislason, S. R. and Schott, J.: Olivine dissolution rates: A critical  
822 review, *Chem. Geol.*, 500(October), 1–19, doi:10.1016/j.chemgeo.2018.10.008, 2018.
- 823 Perkins, A. K., Santos, I. R., Rose, A. L., Schulz, K. G., Grossart, H. P., Eyre, B. D., Kelaher, B. P. and Oakes,  
824 J. M.: Production of dissolved carbon and alkalinity during macroalgal wrack degradation on beaches: a  
825 mesocosm experiment with implications for blue carbon, *Biogeochemistry*, 160(2), 159–175,  
826 doi:10.1007/s10533-022-00946-4, 2022.
- 827 Rau, G. H. and Caldeira, K.: Enhanced carbonate dissolution: A means of sequestering waste CO<sub>2</sub> as ocean  
828 bicarbonate, *Energy Convers. Manag.*, 40(17), 1803–1813, doi:10.1016/S0196-8904(99)00071-0, 1999.
- 829 Reckhardt, A., Beck, M., Seidel, M., Riedel, T., Wehrmann, A., Bartholomä, A., Schnetger, B., Dittmar, T. and  
830 Brumsack, H. J.: Carbon, nutrient and trace metal cycling in sandy sediments: A comparison of high-energy  
831 beaches and backbarrier tidal flats, *Estuar. Coast. Shelf Sci.*, 159, 1–14, doi:10.1016/j.ecss.2015.03.025, 2015.
- 832 Renforth, P.: The negative emission potential of alkaline materials, *Nat. Commun.*, 10, doi:10.1038/s41467-  
833 019-09475-5, 2019.
- 834 Renforth, P. and Henderson, G.: Assessing ocean alkalinity for carbon sequestration, *Rev. Geophys.*, 55(3),  
835 636–674, doi:10.1002/2016RG000533, 2017.
- 836 Renforth, P., Baltruschat, S., Peterson, K., Mihailova, B. D. and Hartmann, J.: Using ikaite and other hydrated  
837 carbonate minerals to increase ocean alkalinity for carbon dioxide removal and environmental remediation,  
838 *Joule*, 6(12), 2674–2679, doi:10.1016/j.joule.2022.11.001, 2022.
- 839 Saderne, V., Fusi, M., Thomson, T., Dunne, A., Mahmud, F., Roth, F., Carvalho, S. and Duarte, C. M.: Total  
840 alkalinity production in a mangrove ecosystem reveals an overlooked Blue Carbon component, *Limnol.*  
841 *Oceanogr. Lett.*, 6(2), 61–67, doi:10.1002/lo12.10170, 2021.
- 842 Schuiling, R. D. and de Boer, P. L.: Rolling stones; fast weathering of olivine in shallow seas for cost-effective  
843 CO<sub>2</sub> capture and mitigation of global warming and ocean acidification, *Earth Syst. Dyn. Discuss.*, 2, 551–568,





- 844 doi:10.5194/esdd-2-551-2011, 2011.
- 845 Schuiling, R. D. and Krijgsman, P.: Enhanced weathering: An effective and cheap tool to sequester CO<sub>2</sub>, *Clim.*
- 846 *Change*, 74(1–3), 349–354, doi:10.1007/s10584-005-3485-y, 2006.
- 847 Schulz, K. G., Bach, L. T. and Dickson, A. G.: Seawater carbonate system considerations for ocean alkalinity
- 848 enhancement research, *Guid. best Pract. Ocean Alkalinity Enhanc.*, 2023.
- 849 Shi, C.: Steel Slag—Its Production, Processing, Characteristics, and Cementitious Properties, *J. Mater. Civ.*
- 850 *Eng.*, 16(3), 230–236, doi:10.1061/(asce)0899-1561(2004)16:3(230), 2004.
- 851 Subhas, A. V., Dong, S., Naviaux, J. D., Rollins, N. E., Ziveri, P., Gray, W., Rae, J. W. B., Liu, X., Byrne, R.
- 852 H., Chen, S., Moore, C., Martell-Bonet, L., Steiner, Z., Antler, G., Hu, H., Lunstrum, A., Hou, Y., Kemnitz, N.,
- 853 Stutsman, J., Pallacks, S., Dugenne, M., Quay, P. D., Berelson, W. M. and Adkins, J. F.: Shallow Calcium
- 854 Carbonate Cycling in the North Pacific Ocean, *Global Biogeochem. Cycles*, 36(5), 1–22,
- 855 doi:10.1029/2022GB007388, 2022.
- 856 Sulpis, O., Jeansson, E., Dinauer, A., Lauvset, S. K. and Middelburg, J. J.: Calcium carbonate dissolution
- 857 patterns in the ocean, *Nat. Geosci.*, 14(6), 423–428, doi:10.1038/s41561-021-00743-y, 2021.
- 858 Sulpis, O., Agrawal, P., Wolthers, M., Munhoven, G., Walker, M. and Middelburg, J. J.: Aragonite dissolution
- 859 protects calcite at the seafloor, *Nat. Commun.*, 13(1), 1–8, doi:10.1038/s41467-022-28711-z, 2022.
- 860 Tyka, M. D., Van Arsdale, C. and Platt, J. C.: CO<sub>2</sub> capture by pumping surface acidity to the deep ocean, *Energy*
- 861 *Environ. Sci.*, 15(2), 786–798, doi:10.1039/d1ee01532j, 2022.
- 862 Wallmann, K., Diesing, M., Scholz, F., Rehder, G., Dale, A. W., Fuhr, M. and Suess, E.: Erosion of carbonate-
- 863 bearing sedimentary rocks may close the alkalinity budget of the Baltic Sea and support atmospheric CO<sub>2</sub>
- 864 uptake in coastal seas, *Front. Mar. Sci.*, 9(September), 1–15, doi:10.3389/fmars.2022.968069, 2022.
- 865 Zhong, S. and Mucci, A.: Calcite and aragonite precipitation from seawater solutions of various salinities:
- 866 Precipitation rates and overgrowth compositions, *Chem. Geol.*, 78, 283–299, doi:10.1016/0009-2541(89)90064-
- 867 8, 1989.
- 868
